# Supplementary material for: The Level of Universities Students’ Test Wiseness in Jordan during Distance Learning in Light of Some Variables
Source: Hindawi journal article supplement (doi:10.1155/2022/6381857), 2022-05-16
Supplement: f1 [file 6381857.f1.txt]

    1.00    2.00    3.00    3.00    5.00    5.00    5.00    5.00    5.00    3.00    2.00    5.00    2.00    5.00    1.00    5.00    5.00    5.00    5.00    5.00    2.00    5.00    5.00    3.00    5.00    5.00    5.00    5.00    5.00    5.00    5.00    5.00    4.38    3.89    4.67    5.00    4.39
    1.00    2.00    3.00     .00    5.00    5.00    5.00    4.00    4.00    5.00    4.00    5.00    4.00    4.00    3.00    4.00    4.00    4.00    4.00    4.00    4.00    4.00    5.00    4.00    5.00    5.00    5.00    4.00    4.00    4.00    4.00    4.00    4.63    3.89    4.67    4.00    4.29
    1.00    2.00    3.00    3.00    5.00    5.00    5.00    5.00    5.00    5.00    5.00    5.00    5.00    5.00    5.00    5.00    5.00    5.00    5.00    5.00    5.00    5.00    5.00    5.00    5.00    5.00    5.00    5.00    5.00    5.00    5.00    5.00    5.00    5.00    5.00    5.00    5.00
    1.00    2.00    1.00     .00    4.00    2.00    5.00    5.00    4.00    4.00    1.00    5.00    2.00    2.00    3.00    4.00    4.00    5.00    5.00    5.00    5.00    4.00    4.00    4.00    4.00    2.00    5.00    5.00    4.00    5.00    5.00    5.00    3.75    3.89    3.83    4.80    4.00
    1.00    1.00    3.00    3.00    5.00    4.00    5.00    4.00    4.00    4.00    2.00    3.00    2.00    3.00    1.00    4.00    3.00    4.00    4.00    4.00    4.00    4.00    4.00    5.00    5.00    4.00    5.00    4.00    3.00    4.00    4.00    4.00    3.88    3.22    4.50    3.80    3.79
    2.00    2.00    3.00     .00    4.00    3.00    3.00    3.00    3.00    1.00    3.00    3.00    3.00    4.00    2.00    2.00    2.00    1.00    3.00    3.00    3.00    3.00    2.00    3.00    4.00    3.00    3.00    3.00    2.00    1.00    3.00    3.00    2.88    2.56    3.00    2.40    2.71
    1.00    1.00    3.00    3.00    5.00    5.00    5.00    5.00    4.00    5.00    4.00    4.00    5.00    3.00    4.00    5.00    5.00    4.00    5.00    5.00    5.00    4.00    3.00    5.00    5.00    5.00    5.00    5.00    5.00    4.00    5.00    5.00    4.63    4.56    4.50    4.80    4.61
    1.00    2.00    3.00     .00    5.00    5.00    5.00    5.00    3.00    3.00    5.00    5.00    5.00    5.00    3.00    5.00    4.00    5.00    5.00    5.00    4.00    5.00    3.00    5.00    5.00    5.00    5.00    5.00    4.00    5.00    5.00    5.00    4.50    4.56    4.67    4.80    4.61
    1.00    2.00    3.00     .00    5.00    2.00    5.00    5.00    4.00    2.00    2.00    3.00    2.00    4.00    1.00    5.00    2.00    2.00    1.00    1.00    4.00    3.00    5.00    5.00    5.00    2.00    5.00    5.00    2.00    2.00    1.00    1.00    3.50    2.44    4.17    2.20    3.07
    1.00    2.00    3.00    3.00    3.00    2.00    5.00    4.00    4.00    3.00    2.00    4.00    2.00    5.00    2.00    5.00    4.00    3.00    4.00    3.00    4.00    2.00    5.00    5.00    3.00    2.00    5.00    4.00    4.00    3.00    4.00    3.00    3.38    3.56    3.67    3.60    3.54
    1.00    2.00    3.00    3.00    5.00    5.00    5.00    5.00    5.00    4.00    3.00    3.00    3.00    4.00    4.00    5.00    4.00    4.00    5.00    4.00    5.00    5.00    4.00    5.00    5.00    5.00    5.00    5.00    4.00    4.00    5.00    4.00    4.38    4.22    4.83    4.40    4.43
    1.00    1.00    3.00     .00    5.00    4.00    4.00    4.00    4.00    4.00    4.00    4.00    4.00    4.00    4.00    4.00    4.00    4.00    4.00    4.00    4.00    4.00    4.00    4.00    5.00    4.00    4.00    4.00    4.00    4.00    4.00    4.00    4.13    4.00    4.17    4.00    4.07
    1.00    2.00    1.00     .00    2.00    2.00    5.00    5.00    5.00    5.00    5.00    5.00    5.00    1.00    5.00    5.00    5.00    5.00    4.00    5.00    5.00    5.00    5.00    5.00    2.00    2.00    5.00    5.00    5.00    5.00    4.00    5.00    4.25    4.44    4.00    4.80    4.36
    1.00    2.00    3.00    3.00    4.00    5.00    4.00    4.00    4.00    4.00    2.00    4.00    3.00    4.00    4.00    5.00    4.00    4.00    4.00    4.00    3.00    4.00    3.00    5.00    4.00    5.00    4.00    4.00    4.00    4.00    4.00    4.00    3.88    3.89    4.17    4.00    3.96
    1.00    2.00    3.00    3.00    4.00    5.00    5.00    5.00    4.00    4.00    4.00    5.00    4.00    3.00    3.00    4.00    4.00    4.00    3.00    5.00    4.00    4.00    3.00    5.00    4.00    5.00    5.00    5.00    4.00    4.00    3.00    5.00    4.50    3.78    4.33    4.20    4.18
    1.00    1.00    3.00     .00    4.00    4.00    5.00    4.00    5.00    4.00    4.00    4.00    4.00    4.00    5.00    4.00    4.00    5.00    4.00    4.00    5.00    5.00    4.00    4.00    4.00    4.00    5.00    4.00    4.00    5.00    4.00    4.00    4.25    4.33    4.33    4.20    4.29
    1.00    1.00    1.00     .00    4.00    4.00    5.00    4.00    3.00    2.00    4.00    4.00    3.00    4.00    2.00    4.00    2.00    3.00    3.00    3.00    3.00    3.00    3.00    5.00    4.00    4.00    5.00    4.00    2.00    3.00    3.00    3.00    3.75    3.00    4.00    3.00    3.43
    1.00    2.00    1.00    3.00    4.00    3.00    4.00    4.00    3.00    2.00    2.00    4.00    2.00    3.00    3.00    4.00    4.00    4.00    4.00    4.00    3.00    3.00    4.00    4.00    4.00    3.00    4.00    4.00    4.00    4.00    4.00    4.00    3.25    3.44    3.67    4.00    3.54
    1.00    1.00    3.00    3.00    5.00    4.00    5.00    5.00    4.00    4.00    4.00    4.00    4.00    3.00    3.00    5.00    4.00    1.00    3.00    3.00    2.00    3.00    5.00    3.00    5.00    4.00    5.00    5.00    4.00    1.00    3.00    3.00    4.38    3.11    4.17    3.20    3.71
    1.00    2.00    3.00     .00    5.00    5.00    5.00    5.00    5.00    5.00    5.00    5.00    5.00    5.00    5.00    5.00    5.00    5.00    5.00    5.00    5.00    5.00    5.00    5.00    5.00    5.00    5.00    5.00    5.00    5.00    5.00    5.00    5.00    5.00    5.00    5.00    5.00
    1.00    1.00    2.00    2.00    5.00    5.00    5.00    4.00    5.00    5.00    5.00    4.00    5.00    4.00    5.00    5.00    5.00    4.00    5.00    5.00    5.00    4.00    4.00    5.00    5.00    5.00    5.00    4.00    5.00    4.00    5.00    5.00    4.75    4.78    4.67    4.60    4.71
    1.00    1.00    1.00    3.00    4.00    5.00    5.00    5.00    4.00    3.00    4.00    5.00    5.00    4.00    3.00    5.00    4.00    3.00    5.00    5.00    4.00    5.00    4.00    5.00    4.00    5.00    5.00    5.00    4.00    3.00    5.00    5.00    4.38    4.22    4.67    4.40    4.39
    1.00    1.00    1.00    3.00    3.00    5.00    4.00    5.00    4.00    3.00    4.00    5.00    4.00    4.00    5.00    4.00    3.00    5.00    5.00    5.00    4.00    3.00    4.00    2.00    3.00    5.00    4.00    5.00    3.00    5.00    5.00    5.00    4.13    4.33    3.50    4.60    4.14
    1.00    1.00    1.00    3.00    5.00    5.00    5.00    4.00    2.00    2.00    3.00    5.00    4.00    4.00    3.00    4.00    2.00    3.00    4.00    3.00    3.00    3.00    4.00    4.00    5.00    5.00    5.00    4.00    2.00    3.00    4.00    3.00    3.88    3.33    4.33    3.20    3.68
    1.00    2.00    3.00    3.00    5.00    4.00    5.00    5.00    5.00    4.00    4.00    5.00    4.00    4.00    4.00    4.00    1.00    3.00    5.00    5.00    4.00    4.00    3.00    4.00    5.00    4.00    5.00    5.00    1.00    3.00    5.00    5.00    4.63    3.78    4.17    3.80    4.11
    1.00    2.00    3.00    3.00    3.00    4.00    4.00    4.00    4.00    4.00    4.00    4.00    4.00    4.00    4.00    4.00    4.00    4.00    4.00    4.00    4.00    4.00    4.00    4.00    3.00    4.00    4.00    4.00    4.00    4.00    4.00    4.00    3.88    4.00    3.83    4.00    3.93
    1.00    2.00    2.00    3.00    4.00    4.00    5.00    5.00    4.00    4.00    4.00    4.00    2.00    4.00    1.00    5.00    5.00    5.00    5.00    4.00    4.00    4.00    2.00    1.00    4.00    4.00    5.00    5.00    5.00    5.00    5.00    4.00    4.25    3.89    3.33    4.80    4.04
    1.00    2.00    1.00    3.00    5.00    1.00    5.00    5.00    5.00    5.00    5.00    5.00    5.00    1.00    3.00    5.00    5.00    5.00    5.00    5.00    5.00    5.00    5.00    5.00    5.00    1.00    5.00    5.00    5.00    5.00    5.00    5.00    4.50    4.33    4.33    5.00    4.50
    1.00    2.00    1.00    1.00    5.00    5.00    4.00    5.00    5.00    3.00    5.00    5.00    4.00    2.00    5.00    5.00    5.00    4.00    4.00    5.00    4.00    5.00    4.00    5.00    5.00    5.00    4.00    5.00    5.00    4.00    4.00    5.00    4.63    4.22    4.67    4.60    4.50
    2.00    2.00    1.00    3.00    4.00    5.00    4.00    4.00    4.00    1.00    1.00    5.00    1.00    5.00    1.00    5.00    5.00    4.00    5.00    5.00    5.00    5.00    5.00    5.00    4.00    5.00    4.00    4.00    5.00    4.00    5.00    5.00    3.50    4.00    4.67    4.60    4.11
    1.00    1.00    1.00     .00    4.00    5.00    4.00    5.00    4.00    5.00    5.00    4.00    3.00    2.00    1.00    4.00    4.00    4.00    5.00    5.00    4.00    5.00    5.00    4.00    4.00    5.00    4.00    5.00    4.00    4.00    5.00    5.00    4.50    3.56    4.50    4.60    4.21
    1.00    1.00    1.00    1.00    3.00    1.00    5.00    4.00    3.00    1.00    4.00    5.00    5.00    2.00    1.00    4.00    3.00    2.00    4.00    5.00    4.00    3.00    1.00    5.00    3.00    1.00    5.00    4.00    3.00    2.00    4.00    5.00    3.25    3.33    3.00    3.60    3.29
    1.00    1.00    1.00    3.00    5.00    5.00    4.00    5.00    4.00    3.00    2.00    5.00    2.00    4.00    4.00    5.00    2.00    5.00    5.00    4.00    3.00    4.00    4.00    5.00    5.00    5.00    4.00    5.00    2.00    5.00    5.00    4.00    4.13    3.78    4.50    4.20    4.11
    1.00    2.00    2.00    2.00    3.00    5.00    5.00    4.00    4.00    4.00    5.00    5.00    5.00    5.00    3.00    4.00    5.00    2.00    5.00    5.00    5.00    5.00    5.00    5.00    3.00    5.00    5.00    4.00    5.00    2.00    5.00    5.00    4.38    4.33    4.67    4.20    4.39
    1.00    2.00    3.00    3.00    4.00    4.00    4.00    5.00    3.00    4.00    5.00    4.00    4.00    5.00    4.00    4.00    4.00    4.00    5.00    5.00    5.00    5.00    4.00    3.00    4.00    4.00    4.00    5.00    4.00    4.00    5.00    5.00    4.13    4.44    4.00    4.60    4.29
    1.00    2.00    2.00    3.00    5.00    3.00    5.00    5.00    5.00    2.00    2.00    5.00    5.00    5.00    3.00    5.00    4.00    5.00    5.00    5.00    5.00    3.00    5.00    5.00    5.00    3.00    5.00    5.00    4.00    5.00    5.00    5.00    4.00    4.67    4.33    4.80    4.43
    1.00    2.00    1.00     .00    4.00    4.00    3.00    5.00    4.00    4.00    4.00    4.00    4.00    5.00    3.00    4.00    3.00    2.00    4.00    3.00    5.00    3.00    3.00    5.00    4.00    4.00    3.00    5.00    3.00    2.00    4.00    3.00    4.00    3.67    3.67    3.40    3.71
    1.00    2.00    2.00    2.00    2.00    2.00    1.00    3.00    2.00    1.00    1.00    3.00    2.00    4.00    1.00    1.00    2.00    2.00    2.00    2.00    2.00    2.00    2.00    3.00    2.00    2.00    1.00    3.00    2.00    2.00    2.00    2.00    1.88    2.00    2.00    2.20    2.00
    1.00    2.00    2.00    3.00    5.00    5.00    4.00    4.00    5.00    2.00    3.00    5.00    3.00    4.00    1.00    4.00    2.00    4.00    2.00    4.00    5.00    2.00    5.00    3.00    5.00    5.00    4.00    4.00    2.00    4.00    2.00    4.00    4.13    3.22    4.00    3.20    3.64
    1.00    2.00    2.00    3.00    3.00    1.00    4.00    3.00    3.00    1.00    1.00    3.00    1.00    3.00    3.00    3.00    4.00    3.00    3.00    3.00    3.00    2.00    1.00    4.00    3.00    1.00    4.00    3.00    4.00    3.00    3.00    3.00    2.38    2.89    2.50    3.20    2.71
    1.00    1.00    1.00    3.00    4.00    5.00    4.00    5.00    5.00    5.00    5.00    5.00    5.00    4.00    4.00    4.00    5.00    5.00    5.00    5.00    5.00    5.00    4.00    5.00    4.00    5.00    4.00    5.00    5.00    5.00    5.00    5.00    4.75    4.67    4.50    5.00    4.71
    1.00    2.00    2.00    3.00    5.00    2.00    5.00    4.00    3.00    2.00    2.00    4.00    3.00    4.00    2.00    3.00    4.00    4.00    4.00    4.00    4.00    5.00    3.00    2.00    5.00    2.00    5.00    4.00    4.00    4.00    4.00    4.00    3.38    3.56    3.67    4.00    3.61
    1.00    2.00    1.00     .00    5.00    5.00    5.00    5.00    4.00    3.00    3.00    5.00    3.00    5.00    3.00    5.00    4.00    2.00    5.00    4.00    2.00    4.00    4.00    2.00    5.00    5.00    5.00    5.00    4.00    2.00    5.00    4.00    4.38    3.67    4.17    4.00    4.04
    1.00    2.00    2.00    3.00    5.00    4.00    5.00    5.00    5.00    5.00    5.00    5.00    5.00    3.00    3.00    5.00    5.00    5.00    5.00    5.00    5.00    5.00    5.00    5.00    5.00    4.00    5.00    5.00    5.00    5.00    5.00    5.00    4.88    4.56    4.83    5.00    4.79
    1.00    2.00    3.00    3.00    3.00    3.00    3.00    4.00    5.00    4.00    5.00    3.00    5.00    5.00    4.00    5.00    3.00    3.00    4.00    4.00    4.00    3.00    4.00    4.00    3.00    3.00    3.00    4.00    3.00    3.00    4.00    4.00    3.75    4.11    3.33    3.60    3.75
    1.00    2.00    2.00    3.00    5.00    5.00    5.00    5.00    5.00    3.00    5.00    5.00    5.00    5.00    5.00    5.00    5.00    5.00    5.00    5.00    5.00    5.00    4.00    5.00    5.00    5.00    5.00    5.00    5.00    5.00    5.00    5.00    4.75    5.00    4.83    5.00    4.89
    1.00    1.00    1.00     .00    5.00    5.00    5.00    5.00    5.00    4.00    4.00    4.00    3.00    4.00    2.00    3.00    5.00    5.00    5.00    5.00    5.00    5.00    1.00    5.00    5.00    5.00    5.00    5.00    5.00    5.00    5.00    5.00    4.63    4.11    4.33    5.00    4.46
    1.00    1.00    1.00    1.00    2.00    4.00    3.00    1.00    4.00    1.00    5.00    4.00    1.00    4.00    5.00    3.00    3.00    2.00    3.00    1.00    4.00    2.00    2.00    1.00    2.00    4.00    3.00    1.00    3.00    2.00    3.00    1.00    3.00    2.89    2.33    2.00    2.64
    1.00    2.00    2.00    3.00    4.00    5.00    4.00    4.00    4.00    3.00    4.00    4.00    4.00    3.00    4.00    4.00    3.00    5.00    5.00    4.00    4.00    4.00    2.00    3.00    4.00    5.00    4.00    4.00    3.00    5.00    5.00    4.00    4.00    4.00    3.67    4.20    3.96
    1.00    2.00    3.00     .00    4.00    4.00    5.00    3.00    3.00    3.00    2.00    5.00    2.00    4.00    4.00    5.00    4.00    4.00    5.00    5.00    5.00    5.00    3.00    1.00    4.00    4.00    5.00    3.00    4.00    4.00    5.00    5.00    3.63    4.22    3.67    4.20    3.93
    1.00    2.00    1.00     .00    5.00    1.00    5.00    5.00    4.00    5.00    2.00    5.00    5.00    4.00    3.00    5.00    5.00    4.00    5.00    4.00    5.00    4.00    1.00    5.00    5.00    1.00    5.00    5.00    5.00    4.00    5.00    4.00    4.00    4.44    3.50    4.60    4.14
    1.00    2.00    1.00    3.00    5.00    5.00    5.00    5.00    5.00    3.00    1.00    5.00    1.00    1.00    5.00    4.00    3.00    5.00    5.00    5.00    5.00    2.00    5.00    5.00    5.00    5.00    5.00    5.00    3.00    5.00    5.00    5.00    4.25    3.78    4.50    4.60    4.21
    1.00    2.00    1.00     .00    5.00    4.00    4.00    5.00    5.00    5.00    4.00    4.00    4.00    4.00    3.00    5.00    5.00    4.00    5.00    5.00    5.00    4.00    5.00    4.00    5.00    4.00    4.00    5.00    5.00    4.00    5.00    5.00    4.50    4.44    4.33    4.80    4.50
    1.00    1.00    1.00     .00    5.00    4.00    4.00    5.00    4.00    3.00    3.00    4.00    3.00    4.00    3.00    4.00    2.00    3.00    5.00    4.00    4.00    4.00    5.00    5.00    5.00    4.00    4.00    5.00    2.00    3.00    5.00    4.00    4.00    3.56    4.50    3.80    3.93
    1.00    1.00    3.00    3.00    4.00    3.00    4.00    4.00    4.00    3.00    4.00    4.00    4.00    2.00    3.00    4.00    4.00    4.00    4.00    4.00    3.00    4.00    2.00    2.00    4.00    3.00    4.00    4.00    4.00    4.00    4.00    4.00    3.75    3.56    3.17    4.00    3.61
    1.00    1.00    1.00     .00    4.00    3.00    5.00    5.00    4.00    2.00    3.00    4.00    3.00    4.00    3.00    4.00    4.00    1.00    4.00    4.00    5.00    4.00    4.00    5.00    4.00    3.00    5.00    5.00    4.00    1.00    4.00    4.00    3.75    3.56    4.17    3.60    3.75
    1.00    2.00    2.00    3.00    3.00    4.00    3.00    3.00    3.00    3.00    3.00    3.00    3.00    3.00    4.00    3.00    5.00    3.00    4.00    3.00    3.00    3.00    4.00    3.00    3.00    4.00    3.00    3.00    5.00    3.00    4.00    3.00    3.13    3.44    3.33    3.60    3.36
    1.00    2.00    3.00     .00    3.00    3.00    5.00    4.00    4.00    4.00    4.00    5.00    4.00    4.00    4.00    5.00    5.00    5.00    5.00    5.00    5.00    5.00    4.00    5.00    3.00    3.00    5.00    4.00    5.00    5.00    5.00    5.00    4.00    4.67    4.17    4.80    4.39
    1.00    2.00    2.00    3.00    3.00    4.00    4.00    5.00    5.00    4.00    4.00    4.00    4.00    3.00    3.00    4.00    4.00    4.00    4.00    4.00    4.00    4.00    4.00    4.00    3.00    4.00    4.00    5.00    4.00    4.00    4.00    4.00    4.13    3.78    3.83    4.20    3.96
    1.00    2.00    3.00    3.00    4.00    5.00    5.00    4.00    5.00    3.00    4.00    5.00    4.00    5.00    3.00    4.00    4.00    5.00    5.00    4.00    4.00    5.00    3.00    4.00    4.00    5.00    5.00    4.00    4.00    5.00    5.00    4.00    4.38    4.22    4.33    4.40    4.32
    1.00    2.00    1.00     .00    4.00    5.00    4.00    4.00    4.00    4.00    1.00    4.00    1.00    4.00    1.00    4.00    3.00    1.00    2.00    2.00    2.00    2.00    2.00    1.00    4.00    5.00    4.00    4.00    3.00    1.00    2.00    2.00    3.75    2.22    3.00    2.40    2.86
    1.00    2.00    3.00     .00    4.00    5.00    4.00    4.00    4.00    4.00    4.00    4.00    4.00    4.00    4.00    5.00    5.00    5.00    5.00    4.00    4.00    4.00    5.00    4.00    4.00    5.00    4.00    4.00    5.00    5.00    5.00    4.00    4.13    4.44    4.33    4.60    4.36
    1.00    2.00    2.00    3.00    5.00    5.00    4.00    5.00    5.00    4.00    4.00    5.00    3.00    5.00    3.00    4.00    4.00    4.00    5.00    5.00    5.00    5.00    5.00    4.00    5.00    5.00    4.00    5.00    4.00    4.00    5.00    5.00    4.63    4.22    4.67    4.60    4.50
    1.00    2.00    1.00    2.00    4.00    5.00    5.00    5.00    4.00    3.00    3.00    5.00    3.00    3.00    3.00    4.00    4.00    4.00    5.00    4.00    4.00    4.00    4.00    3.00    4.00    5.00    5.00    5.00    4.00    4.00    5.00    4.00    4.25    3.78    4.17    4.40    4.11
    1.00    2.00    1.00    3.00    5.00    4.00    4.00    4.00    4.00    5.00    4.00    5.00    4.00    4.00    2.00    4.00    4.00    4.00    4.00    4.00    4.00    4.00    3.00    5.00    5.00    4.00    4.00    4.00    4.00    4.00    4.00    4.00    4.38    3.78    4.17    4.00    4.07
    1.00    1.00    1.00     .00    4.00    5.00    5.00    5.00    4.00    3.00    1.00    4.00    1.00    2.00    3.00    4.00    4.00    4.00    3.00    4.00    5.00    3.00    5.00    5.00    4.00    5.00    5.00    5.00    4.00    4.00    3.00    4.00    3.88    3.33    4.50    4.00    3.86
    1.00    1.00    3.00    3.00    4.00    4.00    4.00    4.00    4.00    4.00    4.00    4.00    4.00    4.00    2.00    4.00    4.00    4.00    4.00    4.00    4.00    4.00    4.00    2.00    4.00    4.00    4.00    4.00    4.00    4.00    4.00    4.00    4.00    3.78    3.67    4.00    3.86
    1.00    1.00    1.00    3.00    4.00    5.00    4.00    4.00    4.00    4.00    3.00    3.00    4.00    1.00    2.00    3.00    2.00    3.00    4.00    3.00    4.00    3.00    3.00    4.00    4.00    5.00    4.00    4.00    2.00    3.00    4.00    3.00    3.88    2.89    3.83    3.20    3.43
    1.00    2.00    3.00    2.00    3.00    3.00    4.00    4.00    4.00    3.00    4.00    4.00    4.00    4.00    3.00    4.00    4.00    4.00    4.00    4.00    4.00    4.00    4.00    3.00    3.00    3.00    4.00    4.00    4.00    4.00    4.00    4.00    3.63    3.89    3.50    4.00    3.75
    1.00    1.00    2.00    3.00    4.00    5.00    5.00    5.00    5.00    2.00    4.00    4.00    4.00    4.00    3.00    5.00    5.00    4.00    4.00    4.00    3.00    2.00    3.00    5.00    4.00    5.00    5.00    5.00    5.00    4.00    4.00    4.00    4.25    4.00    4.00    4.40    4.14
    1.00    2.00    1.00    3.00    4.00    4.00    4.00    4.00    4.00    3.00    4.00    4.00    5.00    4.00    3.00    4.00    3.00    5.00    5.00    5.00    4.00    2.00    3.00    4.00    4.00    4.00    4.00    4.00    3.00    5.00    5.00    5.00    3.88    4.22    3.50    4.40    4.00
    1.00    2.00    3.00    3.00    5.00    3.00    4.00    4.00    3.00    3.00    4.00    4.00    5.00    4.00    3.00    4.00    3.00    5.00    5.00    5.00    4.00    4.00    4.00    3.00    5.00    3.00    4.00    4.00    3.00    5.00    5.00    5.00    3.75    4.22    3.83    4.40    4.04
    1.00    2.00    3.00    3.00    5.00    2.00    5.00    5.00    5.00    5.00    4.00    5.00    2.00    5.00    2.00    5.00    3.00    5.00    5.00    5.00    5.00    3.00    5.00    4.00    5.00    2.00    5.00    5.00    3.00    5.00    5.00    5.00    4.50    4.11    4.00    4.60    4.29
    1.00    2.00    2.00    3.00    4.00    5.00    5.00    5.00    5.00    3.00    5.00    5.00    4.00    4.00    5.00    5.00    5.00    4.00    4.00    5.00    4.00    5.00    4.00    4.00    4.00    5.00    5.00    5.00    5.00    4.00    4.00    5.00    4.63    4.44    4.50    4.60    4.54
    1.00    1.00    3.00     .00    5.00    3.00    4.00    4.00    4.00    3.00    5.00    5.00    4.00    4.00    5.00    5.00    5.00    5.00    5.00    5.00    4.00    4.00    5.00    4.00    5.00    3.00    4.00    4.00    5.00    5.00    5.00    5.00    4.13    4.67    4.17    4.80    4.43
    1.00    1.00    1.00    3.00    5.00    4.00    5.00    4.00    4.00    4.00    5.00    5.00    5.00    5.00    4.00    5.00    5.00    5.00    5.00    5.00    5.00    5.00    5.00    4.00    5.00    4.00    5.00    4.00    5.00    5.00    5.00    5.00    4.50    4.89    4.67    4.80    4.71
    1.00    1.00    3.00     .00    5.00    5.00    5.00    5.00    4.00    3.00    4.00    5.00    5.00    4.00    5.00    5.00    5.00    5.00    5.00    5.00    5.00    4.00    5.00    4.00    5.00    5.00    5.00    5.00    5.00    5.00    5.00    5.00    4.50    4.89    4.67    5.00    4.75
    2.00    2.00    2.00    3.00    3.00    3.00    3.00    3.00    3.00    3.00    3.00    3.00    3.00    3.00    3.00    3.00    3.00    3.00    3.00    3.00    3.00    3.00    3.00    3.00    3.00    3.00    3.00    3.00    3.00    3.00    3.00    3.00    3.00    3.00    3.00    3.00    3.00
    1.00    1.00    3.00    3.00    4.00    5.00    5.00    5.00    5.00    2.00    3.00    5.00    3.00    4.00    4.00    5.00    5.00    5.00    5.00    5.00    5.00    5.00    4.00    5.00    4.00    5.00    5.00    5.00    5.00    5.00    5.00    5.00    4.25    4.56    4.67    5.00    4.57
    1.00    1.00    3.00     .00    5.00    4.00    5.00    5.00    4.00    5.00    5.00    5.00    3.00    4.00    4.00    5.00    4.00    4.00    4.00    3.00    3.00    5.00    5.00    5.00    5.00    4.00    5.00    5.00    4.00    4.00    4.00    3.00    4.75    3.78    4.83    4.00    4.32
    1.00    2.00    2.00    3.00    3.00    3.00    5.00    3.00    5.00    5.00    2.00    4.00    2.00    5.00    1.00    5.00    5.00    5.00    5.00    3.00    5.00    3.00    3.00    5.00    3.00    3.00    5.00    3.00    5.00    5.00    5.00    3.00    3.75    4.00    3.67    4.20    3.89
    1.00    2.00    1.00    3.00    5.00    2.00    5.00    5.00    3.00    3.00    4.00    5.00    2.00    4.00    4.00    5.00    2.00    3.00    5.00    5.00    4.00    5.00    4.00    5.00    5.00    2.00    5.00    5.00    2.00    3.00    5.00    5.00    4.00    3.78    4.33    4.00    4.00
    1.00    1.00    3.00    2.00    5.00    5.00    4.00    5.00    4.00    5.00    5.00    4.00    5.00    5.00    5.00    4.00    4.00    4.00    5.00    5.00    4.00    4.00    5.00    5.00    5.00    5.00    4.00    5.00    4.00    4.00    5.00    5.00    4.63    4.56    4.67    4.60    4.61
    1.00    2.00    2.00    3.00    5.00    5.00    5.00    5.00    4.00    2.00    1.00    5.00    3.00    5.00    4.00    5.00    4.00    5.00    5.00    5.00    5.00    4.00    3.00    1.00    5.00    5.00    5.00    5.00    4.00    5.00    5.00    5.00    4.00    4.56    3.83    4.80    4.29
    1.00    2.00    3.00    3.00    5.00    5.00    5.00    5.00    5.00    5.00    5.00    5.00    2.00    5.00    3.00    5.00    5.00    5.00    5.00    5.00    5.00    5.00    5.00    3.00    5.00    5.00    5.00    5.00    5.00    5.00    5.00    5.00    5.00    4.44    4.67    5.00    4.75
    1.00    1.00    1.00     .00    5.00    1.00    5.00    5.00    5.00    5.00    5.00    5.00    5.00    5.00    1.00    5.00    5.00    5.00    5.00    5.00    5.00    4.00    5.00    5.00    5.00    1.00    5.00    5.00    5.00    5.00    5.00    5.00    4.50    4.56    4.17    5.00    4.54
    1.00    2.00    3.00    3.00    3.00    2.00    4.00    5.00    4.00    3.00    2.00    4.00    2.00    4.00    2.00    4.00    3.00    3.00    4.00    4.00    4.00    2.00    5.00    4.00    3.00    2.00    4.00    5.00    3.00    3.00    4.00    4.00    3.38    3.33    3.33    3.80    3.43
    1.00    2.00    2.00    3.00    4.00    5.00    5.00    4.00    5.00    1.00    5.00    5.00    5.00    2.00    2.00    5.00    3.00    5.00    5.00    5.00    5.00    5.00    1.00    5.00    4.00    5.00    5.00    4.00    3.00    5.00    5.00    5.00    4.25    4.11    4.17    4.40    4.21
    1.00    2.00    2.00    3.00    4.00    5.00    5.00    5.00    3.00    2.00    3.00    5.00    3.00    5.00    2.00    5.00    2.00    5.00    5.00    5.00    5.00    5.00    4.00    5.00    4.00    5.00    5.00    5.00    2.00    5.00    5.00    5.00    4.00    4.11    4.67    4.40    4.25
    1.00    1.00    1.00     .00    5.00    5.00    4.00    5.00    4.00    3.00    4.00    4.00    5.00    4.00    4.00    4.00    4.00    4.00    4.00    4.00    4.00    4.00    5.00    4.00    5.00    5.00    4.00    5.00    4.00    4.00    4.00    4.00    4.25    4.11    4.50    4.20    4.25
    1.00    1.00    1.00    3.00    5.00    3.00    4.00    5.00    5.00    5.00    5.00    5.00    3.00    3.00    4.00    5.00    3.00    4.00    4.00    4.00    5.00    3.00    3.00    3.00    5.00    3.00    4.00    5.00    3.00    4.00    4.00    4.00    4.63    3.89    3.50    4.00    4.04
    1.00    1.00    3.00    3.00    5.00    5.00    5.00    5.00    5.00    5.00    3.00    5.00    5.00    4.00    4.00    5.00    2.00    5.00    5.00    5.00    5.00    2.00    5.00    5.00    5.00    5.00    5.00    5.00    2.00    5.00    5.00    5.00    4.75    4.44    4.50    4.40    4.54
    1.00    2.00    2.00    3.00    3.00    5.00    5.00    4.00    4.00    3.00    5.00    5.00    5.00    4.00    3.00    5.00    4.00    3.00    5.00    4.00    5.00    4.00    3.00    2.00    3.00    5.00    5.00    4.00    4.00    3.00    5.00    4.00    4.25    4.22    3.67    4.00    4.07
    1.00    2.00    1.00     .00    5.00    2.00    4.00    5.00    3.00    4.00    3.00    4.00    3.00    5.00    5.00    5.00    2.00    3.00    5.00    5.00    3.00    5.00    4.00    1.00    5.00    2.00    4.00    5.00    2.00    3.00    5.00    5.00    3.75    4.00    3.50    4.00    3.82
    1.00    2.00    2.00    3.00    3.00    5.00    5.00    5.00    4.00    2.00    4.00    4.00    4.00    1.00    3.00    4.00    2.00    5.00    5.00    3.00    5.00    5.00    1.00    5.00    3.00    5.00    5.00    5.00    2.00    5.00    5.00    3.00    4.00    3.56    4.00    4.00    3.86
    1.00    1.00    3.00    3.00    5.00    4.00    4.00    4.00    3.00    3.00    3.00    4.00    3.00    3.00    5.00    4.00    3.00    3.00    3.00    5.00    2.00    3.00    4.00    3.00    5.00    4.00    4.00    4.00    3.00    3.00    3.00    5.00    3.75    3.44    3.83    3.60    3.64
    1.00    2.00    2.00    3.00    5.00    4.00    5.00    4.00    3.00    3.00    3.00    5.00    3.00    4.00    3.00    5.00    4.00    3.00    4.00    5.00    5.00    5.00    3.00    4.00    5.00    4.00    5.00    4.00    4.00    3.00    4.00    5.00    4.00    4.00    4.33    4.00    4.07
    1.00    2.00    2.00    3.00    5.00    4.00    5.00    4.00    3.00    3.00    3.00    5.00    3.00    4.00    3.00    5.00    4.00    3.00    4.00    5.00    5.00    5.00    3.00    4.00    5.00    4.00    5.00    4.00    4.00    3.00    4.00    5.00    4.00    4.00    4.33    4.00    4.07
    1.00    2.00    3.00    3.00    5.00    5.00    5.00    5.00    5.00    5.00    5.00    4.00    4.00    4.00    4.00    5.00    5.00    5.00    5.00    5.00    5.00    5.00    5.00    5.00    5.00    5.00    5.00    5.00    5.00    5.00    5.00    5.00    4.88    4.67    5.00    5.00    4.86
    1.00    2.00    1.00     .00    5.00    5.00    5.00    3.00    5.00    5.00    5.00    1.00    1.00    1.00    3.00    5.00    5.00    5.00    5.00    1.00    1.00    3.00    1.00    3.00    5.00    5.00    5.00    3.00    5.00    5.00    5.00    1.00    4.25    3.00    3.67    3.80    3.64
    1.00    1.00    3.00    3.00    5.00    5.00    5.00    5.00    4.00    5.00    4.00    4.00    3.00    5.00    4.00    4.00    4.00    3.00    5.00    4.00    2.00    3.00    2.00    4.00    5.00    5.00    5.00    5.00    4.00    3.00    5.00    4.00    4.63    3.78    4.00    4.20    4.14
    1.00    2.00    1.00     .00    3.00    5.00    5.00    5.00    5.00    4.00    3.00    5.00    4.00    4.00    3.00    5.00    3.00    3.00    5.00    5.00    5.00    3.00    1.00    5.00    3.00    5.00    5.00    5.00    3.00    3.00    5.00    5.00    4.38    4.11    3.67    4.20    4.11
    1.00    2.00    1.00    2.00    5.00    5.00    5.00    5.00    5.00    3.00    2.00    5.00    2.00    5.00    4.00    5.00    4.00    5.00    4.00    5.00    5.00    2.00    5.00    4.00    5.00    5.00    5.00    5.00    4.00    5.00    4.00    5.00    4.38    4.33    4.33    4.60    4.39
    1.00    2.00    1.00    3.00    4.00    3.00    4.00    5.00    5.00    4.00    4.00    4.00    3.00    3.00    2.00    4.00    4.00    3.00    4.00    5.00    5.00    4.00    3.00    4.00    4.00    3.00    4.00    5.00    4.00    3.00    4.00    5.00    4.13    3.67    3.67    4.20    3.89
    1.00    2.00    1.00    3.00    5.00    5.00    4.00    4.00    4.00    3.00    1.00    5.00    3.00    5.00    1.00    4.00    4.00    4.00    5.00    5.00    4.00    4.00    2.00    4.00    5.00    5.00    4.00    4.00    4.00    4.00    5.00    5.00    3.88    3.89    4.00    4.40    4.00
    1.00    1.00    3.00     .00    4.00    5.00    5.00    5.00    4.00    3.00    3.00    4.00    4.00    2.00    5.00    4.00    4.00    4.00    5.00    4.00    5.00    5.00    4.00    4.00    4.00    5.00    5.00    5.00    4.00    4.00    5.00    4.00    4.13    4.11    4.50    4.40    4.25
    1.00    2.00    1.00    3.00    4.00    5.00    5.00    5.00    4.00    4.00    4.00    5.00    5.00    3.00    5.00    5.00    5.00    5.00    5.00    5.00    5.00    5.00    4.00    4.00    4.00    5.00    5.00    5.00    5.00    5.00    5.00    5.00    4.50    4.78    4.50    5.00    4.68
    1.00    1.00    3.00    3.00    5.00    5.00    5.00    5.00    5.00    5.00    5.00    5.00    5.00    5.00    5.00    5.00    5.00    5.00    5.00    5.00    5.00    5.00    5.00    5.00    5.00    5.00    5.00    5.00    5.00    5.00    5.00    5.00    5.00    5.00    5.00    5.00    5.00
    1.00    2.00    1.00     .00    4.00    4.00    5.00    5.00    3.00    3.00    3.00    4.00    5.00    4.00    3.00    4.00    4.00    4.00    3.00    3.00    4.00    5.00    3.00    3.00    4.00    4.00    5.00    5.00    4.00    4.00    3.00    3.00    3.88    3.78    4.00    3.80    3.86
    1.00    2.00    2.00    3.00    5.00    4.00    5.00    4.00    3.00    5.00    5.00    4.00    5.00    4.00    2.00    5.00    5.00    5.00    5.00    5.00    5.00    5.00    3.00    3.00    5.00    4.00    5.00    4.00    5.00    5.00    5.00    5.00    4.38    4.56    4.17    4.80    4.46
    1.00    2.00    3.00    3.00    5.00    5.00    5.00    4.00    5.00    5.00    2.00    5.00    2.00    5.00    1.00    3.00    5.00    2.00    5.00    5.00    5.00    5.00    3.00    5.00    5.00    5.00    5.00    4.00    5.00    2.00    5.00    5.00    4.50    3.67    4.67    4.20    4.21
    1.00    1.00    3.00    3.00    5.00    5.00    5.00    5.00    5.00    5.00    1.00    5.00    2.00    2.00    2.00    5.00    5.00    2.00    5.00    5.00    5.00    5.00    5.00    5.00    5.00    5.00    5.00    5.00    5.00    2.00    5.00    5.00    4.50    3.67    5.00    4.40    4.32
    1.00    2.00    3.00    3.00    5.00    5.00    5.00    5.00    4.00    4.00    4.00    5.00    2.00    4.00    4.00    5.00    5.00    5.00    5.00    5.00    5.00    5.00    5.00    3.00    5.00    5.00    5.00    5.00    5.00    5.00    5.00    5.00    4.63    4.44    4.67    5.00    4.64
    1.00    2.00    2.00    3.00    5.00    5.00    5.00    5.00    5.00    5.00    5.00    5.00    5.00    5.00    5.00    5.00    5.00    5.00    5.00    5.00    5.00    5.00    5.00    5.00    5.00    5.00    5.00    5.00    5.00    5.00    5.00    5.00    5.00    5.00    5.00    5.00    5.00
    1.00    2.00    1.00     .00    5.00    5.00    5.00    5.00    4.00    4.00    5.00    3.00    1.00    2.00    3.00    3.00    3.00    2.00    3.00    5.00    5.00    4.00    3.00    3.00    5.00    5.00    5.00    5.00    3.00    2.00    3.00    5.00    4.50    3.00    4.17    3.60    3.79
    1.00    1.00    3.00     .00    5.00    4.00    4.00    3.00    3.00    2.00    3.00    5.00    3.00    4.00    5.00    4.00    3.00    5.00    5.00    4.00    4.00    4.00    5.00    5.00    5.00    4.00    4.00    3.00    3.00    5.00    5.00    4.00    3.63    4.11    4.50    4.00    4.04
    1.00    1.00    2.00    3.00    4.00    4.00    5.00    5.00    5.00    3.00    1.00    5.00    1.00    5.00    3.00    5.00    5.00    5.00    5.00    5.00    5.00    5.00    5.00    5.00    4.00    4.00    5.00    5.00    5.00    5.00    5.00    5.00    4.00    4.33    4.67    5.00    4.43
    1.00    1.00    3.00    3.00    5.00    5.00    4.00    4.00    4.00    3.00    2.00    4.00    1.00    4.00    3.00    5.00    5.00    4.00    5.00    4.00    3.00    3.00    5.00    5.00    5.00    5.00    4.00    4.00    5.00    4.00    5.00    4.00    3.88    3.78    4.50    4.40    4.07
    1.00    2.00    3.00    3.00    5.00    5.00    5.00    5.00    4.00    5.00    5.00    4.00    4.00    4.00    4.00    4.00    3.00    4.00    4.00    3.00    4.00    4.00    3.00    4.00    5.00    5.00    5.00    5.00    3.00    4.00    4.00    3.00    4.75    3.78    4.33    3.80    4.18
    1.00    2.00    3.00     .00    5.00    5.00    5.00    5.00    5.00    4.00    1.00    5.00    1.00    2.00    5.00    5.00    4.00    4.00    4.00    5.00    5.00    4.00    4.00    4.00    5.00    5.00    5.00    5.00    4.00    4.00    4.00    5.00    4.38    3.89    4.50    4.40    4.25
    1.00    2.00    3.00    2.00    4.00    4.00    4.00    4.00    4.00    4.00    4.00    4.00    4.00    4.00    4.00    4.00    4.00    4.00    4.00    4.00    4.00    4.00    4.00    4.00    4.00    4.00    4.00    4.00    4.00    4.00    4.00    4.00    4.00    4.00    4.00    4.00    4.00
    1.00    2.00    3.00     .00    5.00    5.00    5.00    4.00    4.00    3.00    4.00    5.00    4.00    4.00    4.00    5.00    4.00    4.00    4.00    5.00    4.00    2.00    4.00    1.00    5.00    5.00    5.00    4.00    4.00    4.00    4.00    5.00    4.38    4.22    3.67    4.20    4.14
    1.00    2.00    2.00    3.00    4.00    5.00    4.00    3.00    3.00    5.00    2.00    4.00    2.00    3.00    3.00    4.00    5.00    1.00    5.00    3.00    5.00    4.00    2.00    5.00    4.00    5.00    4.00    3.00    5.00    1.00    5.00    3.00    3.75    3.44    4.00    3.40    3.64
    1.00    2.00    3.00     .00    4.00    4.00    4.00    4.00    4.00    3.00    3.00    4.00    3.00    4.00    3.00    4.00    3.00    3.00    4.00    4.00    3.00    4.00    3.00    5.00    4.00    4.00    4.00    4.00    3.00    3.00    4.00    4.00    3.75    3.44    4.00    3.60    3.68
    1.00    1.00    3.00    3.00    4.00    4.00    4.00    4.00    3.00    3.00    3.00    4.00    5.00    4.00    4.00    3.00    3.00    2.00    3.00    3.00    3.00    4.00    2.00    3.00    4.00    4.00    4.00    4.00    3.00    2.00    3.00    3.00    3.63    3.33    3.50    3.00    3.39
    1.00    1.00    3.00    3.00    4.00    4.00    4.00    4.00    3.00    3.00    4.00    4.00    4.00    4.00    3.00    4.00    3.00    2.00    2.00    3.00    3.00    2.00    2.00    3.00    4.00    4.00    4.00    4.00    3.00    2.00    2.00    3.00    3.75    3.11    3.17    2.80    3.25
    2.00    1.00    2.00    2.00    3.00    5.00    4.00    4.00    4.00    3.00    3.00    3.00    3.00    3.00    3.00    3.00    3.00    3.00    3.00    3.00    3.00    3.00    3.00    3.00    3.00    5.00    4.00    4.00    3.00    3.00    3.00    3.00    3.63    3.00    3.50    3.20    3.32
    1.00    2.00    3.00    3.00    3.00    5.00    5.00    5.00    5.00    3.00    2.00    5.00    1.00    5.00    4.00    5.00    5.00    4.00    5.00    5.00    5.00    5.00    3.00    3.00    3.00    5.00    5.00    5.00    5.00    4.00    5.00    5.00    4.13    4.33    4.00    4.80    4.29
    1.00    2.00    3.00    3.00    4.00    4.00    4.00    4.00    4.00    4.00    4.00    4.00    4.00    4.00    4.00    4.00    4.00    3.00    4.00    3.00    2.00    4.00    4.00    4.00    4.00    4.00    4.00    4.00    4.00    3.00    4.00    3.00    4.00    3.56    4.00    3.60    3.79
    2.00    2.00    2.00    3.00    4.00    5.00    5.00    4.00    2.00    4.00    4.00    5.00    4.00    5.00    1.00    5.00    5.00    3.00    5.00    5.00    3.00    4.00    2.00    5.00    4.00    5.00    5.00    4.00    5.00    3.00    5.00    5.00    4.13    4.00    4.17    4.40    4.14
    1.00    2.00    3.00    3.00    4.00    4.00    4.00    4.00    3.00    3.00    2.00    3.00    3.00    3.00    3.00    4.00    3.00    4.00    4.00    4.00    4.00    2.00    4.00    3.00    4.00    4.00    4.00    4.00    3.00    4.00    4.00    4.00    3.38    3.56    3.50    3.80    3.54
    1.00    2.00    3.00    3.00    5.00    2.00    5.00    5.00    5.00    5.00    5.00    5.00    5.00    5.00    5.00    5.00    5.00    5.00    5.00    5.00    5.00    5.00    5.00    5.00    5.00    2.00    5.00    5.00    5.00    5.00    5.00    5.00    4.63    5.00    4.50    5.00    4.79
    2.00    1.00    3.00    3.00    4.00    1.00    3.00    4.00    2.00    2.00    4.00    4.00    4.00    3.00    4.00    4.00    3.00    5.00    4.00    4.00    4.00    2.00    4.00    5.00    4.00    1.00    3.00    4.00    3.00    5.00    4.00    4.00    3.00    3.89    3.17    4.00    3.50
    1.00    2.00    3.00     .00    5.00    5.00    5.00    5.00    5.00    4.00    2.00    5.00    2.00    3.00    5.00    5.00    5.00    4.00    5.00    5.00    5.00    5.00    2.00    5.00    5.00    5.00    5.00    5.00    5.00    4.00    5.00    5.00    4.50    4.33    4.50    4.80    4.50
    1.00    2.00    3.00     .00    4.00    3.00    4.00    3.00    4.00    4.00    4.00    4.00    2.00    3.00    3.00    3.00    1.00    3.00    5.00    4.00    3.00    3.00    3.00    4.00    4.00    3.00    4.00    3.00    1.00    3.00    5.00    4.00    3.75    3.00    3.50    3.20    3.36
    1.00    2.00    3.00     .00    4.00    3.00    4.00    4.00    4.00    3.00    4.00    5.00    4.00    4.00    3.00    4.00    4.00    3.00    4.00    4.00    4.00    3.00    3.00    4.00    4.00    3.00    4.00    4.00    4.00    3.00    4.00    4.00    3.88    3.78    3.50    3.80    3.75
    1.00    2.00    3.00    3.00    5.00    5.00    5.00    4.00    5.00    5.00    3.00    5.00    3.00    4.00    5.00    5.00    3.00    5.00    5.00    4.00    5.00    5.00    3.00    2.00    5.00    5.00    5.00    4.00    3.00    5.00    5.00    4.00    4.63    4.33    4.17    4.20    4.36
    1.00    1.00    2.00    3.00    4.00    5.00    5.00    5.00    5.00    3.00    4.00    5.00    4.00    4.00    4.00    5.00    4.00    3.00    4.00    5.00    4.00    2.00    5.00    5.00    4.00    5.00    5.00    5.00    4.00    3.00    4.00    5.00    4.50    4.11    4.33    4.20    4.29
    1.00    1.00    2.00    3.00    2.00    4.00    5.00    4.00    4.00    5.00    1.00    4.00    1.00    4.00    1.00    3.00    5.00    5.00    5.00    5.00    4.00    5.00    5.00    5.00    2.00    4.00    5.00    4.00    5.00    5.00    5.00    5.00    3.63    3.67    4.33    4.80    4.00
    1.00    2.00    3.00    3.00    4.00    4.00    3.00    4.00    3.00    4.00    4.00    3.00    4.00    4.00    3.00    4.00    2.00    2.00    4.00    4.00    4.00    2.00    3.00    4.00    4.00    4.00    3.00    4.00    2.00    2.00    4.00    4.00    3.63    3.44    3.33    3.20    3.43
    1.00    1.00    3.00     .00    2.00    4.00    5.00    2.00    2.00    1.00    1.00    5.00    1.00    1.00    1.00    4.00    3.00    1.00    1.00    5.00    3.00    3.00    5.00    1.00    2.00    4.00    5.00    2.00    3.00    1.00    1.00    5.00    2.75    2.22    3.33    2.40    2.64
    2.00    2.00    3.00     .00    4.00    5.00    5.00    5.00    3.00    3.00    3.00    4.00    3.00    4.00    3.00    4.00    3.00    3.00    4.00    4.00    5.00    2.00    5.00    5.00    4.00    5.00    5.00    5.00    3.00    3.00    4.00    4.00    4.00    3.67    4.33    3.80    3.93
    1.00    1.00    2.00    2.00    2.00    4.00    4.00    4.00    5.00    3.00    4.00    4.00    4.00    4.00    3.00    5.00    4.00    5.00    5.00    3.00    4.00    4.00    4.00    5.00    2.00    4.00    4.00    4.00    4.00    5.00    5.00    3.00    3.75    4.11    3.83    4.20    3.96
    1.00    1.00    3.00    3.00    4.00    4.00    4.00    4.00    4.00    3.00    3.00    3.00    3.00    4.00    4.00    4.00    3.00    3.00    3.00    4.00    3.00    3.00    3.00    4.00    4.00    4.00    4.00    4.00    3.00    3.00    3.00    4.00    3.63    3.44    3.67    3.40    3.54
    1.00    1.00    2.00    3.00    3.00    3.00    3.00    4.00    4.00    4.00    2.00    5.00    3.00    4.00    4.00    5.00    5.00    5.00    4.00    4.00    4.00    4.00    4.00    2.00    3.00    3.00    3.00    4.00    5.00    5.00    4.00    4.00    3.50    4.22    3.17    4.40    3.82
    1.00    2.00    3.00    3.00    5.00    5.00    5.00    5.00    5.00    5.00    5.00    5.00    5.00    5.00    3.00    5.00    4.00    5.00    5.00    5.00    5.00    4.00    5.00    4.00    5.00    5.00    5.00    5.00    4.00    5.00    5.00    5.00    5.00    4.67    4.67    4.80    4.79
    1.00    2.00    2.00    3.00    5.00    5.00    5.00    5.00    5.00    5.00    2.00    5.00    2.00    5.00    1.00    4.00    5.00    5.00    5.00    5.00    3.00    5.00    5.00    2.00    5.00    5.00    5.00    5.00    5.00    5.00    5.00    5.00    4.63    3.89    4.50    5.00    4.43
    1.00    2.00    1.00    3.00    5.00    5.00    5.00    5.00    4.00    3.00    1.00    5.00    1.00    1.00    2.00    5.00    5.00    5.00    5.00    3.00    3.00    4.00    5.00    5.00    5.00    5.00    5.00    5.00    5.00    5.00    5.00    3.00    4.13    3.33    4.83    4.60    4.11
    2.00    1.00    2.00    3.00    5.00    4.00    5.00    4.00    4.00    4.00    5.00    5.00    4.00    5.00    4.00    4.00    5.00    5.00    5.00    5.00    4.00    4.00    4.00    4.00    5.00    4.00    5.00    4.00    5.00    5.00    5.00    5.00    4.50    4.56    4.33    4.80    4.54
    1.00    1.00    3.00    2.00    4.00    5.00    5.00    4.00    4.00    3.00    1.00    4.00    1.00    3.00    2.00    4.00    4.00    4.00    4.00    4.00    4.00    5.00    2.00    5.00    4.00    5.00    5.00    4.00    4.00    4.00    4.00    4.00    3.75    3.33    4.33    4.00    3.79
    1.00    1.00    3.00    3.00    5.00    5.00    5.00    5.00    5.00    4.00    2.00    5.00    2.00    5.00    3.00    5.00    5.00    2.00    2.00    5.00    2.00    2.00    5.00    5.00    5.00    5.00    5.00    5.00    5.00    2.00    2.00    5.00    4.50    3.44    4.50    3.80    4.04
    1.00    1.00    3.00    3.00    5.00    5.00    5.00    5.00    5.00    5.00    4.00    5.00    4.00    4.00    3.00    3.00    3.00    5.00    5.00    4.00    4.00    5.00    3.00    5.00    5.00    5.00    5.00    5.00    3.00    5.00    5.00    4.00    4.88    3.89    4.67    4.40    4.43
    1.00    2.00    3.00    3.00    4.00    1.00    5.00    5.00    5.00    2.00    5.00    5.00    5.00    5.00    5.00    5.00    2.00    5.00    5.00    5.00    5.00    2.00    5.00    5.00    4.00    1.00    5.00    5.00    2.00    5.00    5.00    5.00    4.00    4.67    3.67    4.40    4.21
    1.00    2.00    3.00     .00    4.00    5.00    5.00    5.00    5.00    5.00    5.00    5.00    5.00    5.00    5.00    5.00    5.00    5.00    4.00    4.00    4.00    4.00    3.00    4.00    4.00    5.00    5.00    5.00    5.00    5.00    4.00    4.00    4.88    4.67    4.17    4.60    4.61
    1.00    2.00    3.00     .00    5.00    5.00    4.00    4.00    3.00    3.00    4.00    4.00    4.00    4.00    4.00    4.00    4.00    4.00    4.00    3.00    3.00    3.00    4.00    3.00    5.00    5.00    4.00    4.00    4.00    4.00    4.00    3.00    4.00    3.78    4.00    3.80    3.89
    1.00    1.00    3.00     .00    4.00    4.00    3.00    4.00    2.00    3.00    3.00    3.00    3.00    3.00    2.00    4.00    2.00    2.00    5.00    2.00    2.00    2.00    5.00    2.00    4.00    4.00    3.00    4.00    2.00    2.00    5.00    2.00    3.25    2.78    3.33    3.00    3.07
    1.00    1.00    1.00     .00    4.00    4.00    5.00    5.00    4.00    4.00    1.00    5.00    1.00    4.00    1.00    5.00    1.00    5.00    5.00    5.00    4.00    5.00    4.00    5.00    4.00    4.00    5.00    5.00    1.00    5.00    5.00    5.00    4.00    3.44    4.50    4.20    3.96
    1.00    1.00    3.00    3.00    4.00    4.00    5.00    4.00    5.00    4.00    4.00    4.00    5.00    4.00    4.00    5.00    4.00    4.00    5.00    5.00    4.00    5.00    4.00    4.00    4.00    4.00    5.00    4.00    4.00    4.00    5.00    5.00    4.25    4.44    4.33    4.40    4.36
    1.00    1.00    3.00    3.00    4.00    5.00    4.00    5.00    3.00    3.00    3.00    4.00    2.00    3.00    5.00    4.00    2.00    2.00    2.00    4.00    3.00    4.00    1.00    4.00    4.00    5.00    4.00    5.00    2.00    2.00    2.00    4.00    3.88    3.00    3.67    3.00    3.39
    1.00    1.00    3.00     .00    5.00    5.00    4.00    4.00    4.00    4.00    4.00    5.00    5.00    4.00    4.00    4.00    5.00    5.00    5.00    5.00    5.00    5.00    5.00    5.00    5.00    5.00    4.00    4.00    5.00    5.00    5.00    5.00    4.38    4.67    4.83    4.80    4.64
    1.00    1.00    3.00    3.00    5.00    5.00    5.00    4.00    3.00    4.00    4.00    5.00    4.00    5.00    4.00    4.00    5.00    4.00    4.00    5.00    5.00    5.00    4.00    4.00    5.00    5.00    5.00    4.00    5.00    4.00    4.00    5.00    4.38    4.44    4.67    4.40    4.46
    1.00    1.00    3.00    3.00    5.00    5.00    4.00    5.00    5.00    4.00    4.00    5.00    5.00    4.00    4.00    5.00    4.00    4.00    4.00    4.00    4.00    4.00    5.00    4.00    5.00    5.00    4.00    5.00    4.00    4.00    4.00    4.00    4.63    4.22    4.50    4.20    4.39
    1.00    2.00    1.00     .00    5.00    5.00    5.00    5.00    5.00    3.00    1.00    5.00    1.00    1.00    5.00    5.00    5.00    1.00    1.00    5.00    1.00    1.00    5.00    1.00    5.00    5.00    5.00    5.00    5.00    1.00    1.00    5.00    4.25    2.78    3.67    3.40    3.50
    1.00    2.00    3.00    3.00    5.00    5.00    5.00    5.00    5.00    2.00    5.00    5.00    5.00    5.00    5.00    5.00    2.00    5.00    2.00    5.00    5.00    2.00    3.00    5.00    5.00    5.00    5.00    5.00    2.00    5.00    2.00    5.00    4.63    4.33    4.17    3.80    4.29
    1.00    1.00    3.00     .00    4.00    5.00    4.00    4.00    4.00    3.00    3.00    4.00    4.00    4.00    3.00    4.00    4.00    3.00    4.00    4.00    4.00    4.00    4.00    4.00    4.00    5.00    4.00    4.00    4.00    3.00    4.00    4.00    3.88    3.78    4.17    3.80    3.89
    1.00    1.00    3.00    3.00    4.00    4.00    4.00    4.00    5.00    3.00    5.00    4.00    5.00    4.00    4.00    5.00    5.00    5.00    5.00    5.00    5.00    3.00    3.00    3.00    4.00    4.00    4.00    4.00    5.00    5.00    5.00    5.00    4.13    4.78    3.50    4.80    4.32
    2.00    1.00    2.00    3.00    5.00    5.00    5.00    5.00    5.00    1.00    1.00    5.00    1.00    1.00    1.00    1.00    5.00    1.00    5.00    5.00    5.00    5.00    5.00    1.00    5.00    5.00    5.00    5.00    5.00    1.00    5.00    5.00    4.00    2.78    4.33    4.20    3.71
    1.00    2.00    3.00     .00    4.00    4.00    4.00    5.00    5.00    4.00    4.00    5.00    4.00    4.00    4.00    4.00    5.00    5.00    5.00    5.00    5.00    4.00    4.00    4.00    4.00    4.00    4.00    5.00    5.00    5.00    5.00    5.00    4.38    4.56    4.00    5.00    4.46
    2.00    1.00    3.00    3.00    5.00    5.00    5.00    5.00    5.00    3.00    5.00    5.00    5.00    5.00    1.00    5.00    5.00    5.00    5.00    5.00    5.00    5.00    3.00    4.00    5.00    5.00    5.00    5.00    5.00    5.00    5.00    5.00    4.75    4.56    4.50    5.00    4.68
    1.00    2.00    3.00    3.00    4.00    5.00    5.00    4.00    4.00    4.00    4.00    4.00    4.00    4.00    4.00    4.00    4.00    4.00    4.00    4.00    4.00    4.00    4.00    4.00    4.00    5.00    5.00    4.00    4.00    4.00    4.00    4.00    4.25    4.00    4.33    4.00    4.14
    1.00    1.00    3.00     .00    5.00    5.00    5.00    5.00    5.00    4.00    4.00    4.00    4.00    5.00    5.00    5.00    4.00    5.00    5.00    5.00    5.00    5.00    4.00    5.00    5.00    5.00    5.00    5.00    4.00    5.00    5.00    5.00    4.63    4.78    4.83    4.80    4.75
    1.00    1.00    2.00    3.00    4.00    4.00    5.00    4.00    4.00    4.00    5.00    5.00    5.00    5.00    4.00    4.00    5.00    4.00    5.00    5.00    3.00    4.00    4.00    5.00    4.00    4.00    5.00    4.00    5.00    4.00    5.00    5.00    4.38    4.44    4.33    4.60    4.43
    1.00    2.00    2.00    3.00    3.00    5.00    5.00    4.00    5.00    5.00    5.00    5.00    5.00    5.00    5.00    3.00    4.00    4.00    3.00    4.00    1.00    1.00    2.00    1.00    3.00    5.00    5.00    4.00    4.00    4.00    3.00    4.00    4.63    3.78    2.83    3.80    3.82
    1.00    1.00    3.00    3.00    5.00    4.00    5.00    4.00    4.00    3.00    3.00    4.00    3.00    3.00    5.00    4.00    4.00    3.00    4.00    4.00    4.00    4.00    4.00    4.00    5.00    4.00    5.00    4.00    4.00    3.00    4.00    4.00    4.00    3.78    4.33    3.80    3.96
    1.00    2.00    3.00     .00    5.00    5.00    4.00    3.00    5.00    5.00    4.00    3.00    3.00    4.00    4.00    4.00    3.00    4.00    4.00    4.00    5.00    3.00    4.00    4.00    5.00    5.00    4.00    3.00    3.00    4.00    4.00    4.00    4.25    3.89    4.17    3.60    4.00
    2.00    1.00    3.00    3.00    4.00    4.00    4.00    4.00    4.00    4.00    4.00    4.00    4.00    4.00    4.00    4.00    4.00    4.00    4.00    4.00    4.00    4.00    4.00    4.00    4.00    4.00    4.00    4.00    4.00    4.00    4.00    4.00    4.00    4.00    4.00    4.00    4.00
    1.00    2.00    3.00     .00    3.00    3.00    4.00    5.00    4.00    3.00    4.00    5.00    5.00    4.00    1.00    5.00    2.00    2.00    3.00    4.00    4.00    1.00    4.00    5.00    3.00    3.00    4.00    5.00    2.00    2.00    3.00    4.00    3.88    3.33    3.33    3.20    3.46
    1.00    2.00    3.00    3.00    4.00    5.00    5.00    5.00    5.00    4.00    4.00    5.00    5.00    5.00    4.00    5.00    4.00    4.00    5.00    5.00    5.00    5.00    4.00    4.00    4.00    5.00    5.00    5.00    4.00    4.00    5.00    5.00    4.63    4.67    4.50    4.60    4.61
    1.00    1.00    3.00    3.00    5.00    5.00    5.00    5.00    5.00    4.00    4.00    5.00    5.00    5.00    5.00    5.00    5.00    4.00    4.00    4.00    5.00    4.00    5.00    5.00    5.00    5.00    5.00    5.00    5.00    4.00    4.00    4.00    4.75    4.67    4.83    4.40    4.68
    1.00    2.00    3.00    2.00    4.00    4.00    5.00    5.00    4.00    3.00    2.00    5.00    2.00    4.00    2.00    5.00    4.00    4.00    3.00    3.00    4.00    3.00    3.00    3.00    4.00    4.00    5.00    5.00    4.00    4.00    3.00    3.00    4.00    3.44    3.67    3.80    3.71
    1.00    1.00    3.00    3.00    5.00    5.00    5.00    4.00    4.00    3.00    3.00    3.00    4.00    4.00    5.00    5.00    4.00    4.00    5.00    4.00    4.00    4.00    2.00    4.00    5.00    5.00    5.00    4.00    4.00    4.00    5.00    4.00    4.00    4.33    4.17    4.20    4.18
    1.00    1.00    3.00    3.00    5.00    5.00    4.00    4.00    5.00    5.00    5.00    4.00    5.00    3.00    3.00    5.00    5.00    5.00    5.00    3.00    4.00    5.00    5.00    3.00    5.00    5.00    4.00    4.00    5.00    5.00    5.00    3.00    4.63    4.22    4.50    4.40    4.43
    1.00    2.00    3.00    3.00    5.00    5.00    5.00    5.00    5.00    5.00    5.00    5.00    5.00    2.00    3.00    5.00    5.00    5.00    5.00    4.00    5.00    5.00    5.00    5.00    5.00    5.00    5.00    5.00    5.00    5.00    5.00    4.00    5.00    4.33    5.00    4.80    4.75
    1.00    2.00    3.00     .00    2.00    3.00    3.00    1.00    4.00    1.00    4.00    3.00    4.00    5.00    1.00    4.00    2.00    1.00    2.00    2.00    2.00    2.00    4.00    2.00    2.00    3.00    3.00    1.00    2.00    1.00    2.00    2.00    2.63    2.56    2.67    1.60    2.43
    1.00    2.00    3.00    3.00    4.00    4.00    4.00    4.00    3.00    3.00    3.00    4.00    4.00    5.00    4.00    3.00    4.00    5.00    5.00    3.00    3.00    3.00    3.00    4.00    4.00    4.00    4.00    4.00    4.00    5.00    5.00    3.00    3.63    4.00    3.67    4.20    3.86
    1.00    2.00    3.00    3.00    5.00    4.00    4.00    4.00    3.00    4.00    4.00    4.00    4.00    2.00    4.00    4.00    4.00    4.00    4.00    4.00    2.00    2.00    4.00    4.00    5.00    4.00    4.00    4.00    4.00    4.00    4.00    4.00    4.00    3.56    3.83    4.00    3.82
    1.00    1.00    3.00    3.00    4.00    4.00    5.00    5.00    4.00    4.00    3.00    4.00    3.00    3.00    3.00    4.00    4.00    3.00    3.00    3.00    4.00    5.00    3.00    3.00    4.00    4.00    5.00    5.00    4.00    3.00    3.00    3.00    4.13    3.33    4.00    3.60    3.75
    1.00    2.00    3.00    3.00    3.00    3.00    4.00    5.00    4.00    2.00    2.00    4.00    2.00    4.00    2.00    4.00    3.00    3.00    4.00    2.00    4.00    2.00    4.00    3.00    3.00    3.00    4.00    5.00    3.00    3.00    4.00    2.00    3.38    3.11    3.17    3.40    3.25
    1.00    1.00    3.00     .00    5.00    4.00    4.00    4.00    4.00    5.00    5.00    5.00    5.00    2.00    4.00    4.00    2.00    4.00    5.00    5.00    5.00    5.00    5.00    5.00    5.00    4.00    4.00    4.00    2.00    4.00    5.00    5.00    4.50    4.00    4.67    4.00    4.29
    2.00    1.00    3.00    3.00    5.00    5.00    5.00    5.00    5.00    4.00    5.00    5.00    5.00    5.00    5.00    5.00    5.00    5.00    5.00    5.00    5.00    5.00    5.00    5.00    5.00    5.00    5.00    5.00    5.00    5.00    5.00    5.00    4.88    5.00    5.00    5.00    4.96
    1.00    2.00    3.00     .00    5.00    5.00    5.00    5.00    5.00    5.00    5.00    5.00    5.00    5.00    5.00    4.00    5.00    5.00    4.00    5.00    4.00    3.00    4.00    3.00    5.00    5.00    5.00    5.00    5.00    5.00    4.00    5.00    5.00    4.67    4.17    4.80    4.68
    1.00    2.00    2.00    3.00    4.00    4.00    4.00    4.00    4.00    3.00    4.00    4.00    4.00    4.00    5.00    4.00    4.00    3.00    4.00    4.00    4.00    4.00    4.00    4.00    4.00    4.00    4.00    4.00    4.00    3.00    4.00    4.00    3.88    4.00    4.00    3.80    3.93
    1.00    2.00    3.00    3.00    4.00    4.00    4.00    4.00    4.00    4.00    4.00    4.00    4.00    4.00    4.00    4.00    4.00    4.00    4.00    4.00    4.00    3.00    4.00    3.00    4.00    4.00    4.00    4.00    4.00    4.00    4.00    4.00    4.00    4.00    3.67    4.00    3.93
    1.00    2.00    3.00    3.00    5.00    4.00    5.00    4.00    3.00    3.00    5.00    5.00    4.00    4.00    5.00    4.00    4.00    4.00    4.00    4.00    4.00    4.00    4.00    5.00    5.00    4.00    5.00    4.00    4.00    4.00    4.00    4.00    4.25    4.11    4.50    4.00    4.21
    1.00    2.00    2.00    3.00    5.00    5.00    5.00    4.00    4.00    5.00    5.00    5.00    3.00    3.00    4.00    4.00    4.00    4.00    5.00    4.00    5.00    5.00    5.00    5.00    5.00    5.00    5.00    4.00    4.00    4.00    5.00    4.00    4.75    4.00    5.00    4.20    4.46
    1.00    2.00    3.00    3.00    4.00    5.00    5.00    5.00    5.00    5.00    5.00    4.00    4.00    4.00    4.00    4.00    3.00    5.00    5.00    5.00    5.00    5.00    5.00    5.00    4.00    5.00    5.00    5.00    3.00    5.00    5.00    5.00    4.75    4.33    4.83    4.60    4.61
    1.00    2.00    3.00    3.00    4.00    4.00    3.00    4.00    2.00    2.00    1.00    4.00    5.00    5.00    3.00    5.00    5.00    4.00    5.00    5.00    4.00    5.00    5.00    5.00    4.00    4.00    3.00    4.00    5.00    4.00    5.00    5.00    3.00    4.56    4.33    4.60    4.07
    2.00    2.00    3.00    3.00    4.00    2.00    4.00    5.00    4.00    5.00    5.00    5.00    5.00    4.00    3.00    5.00    4.00    4.00    4.00    4.00    4.00    4.00    4.00    5.00    4.00    2.00    4.00    5.00    4.00    4.00    4.00    4.00    4.25    4.11    3.83    4.20    4.11
    1.00    2.00    1.00     .00    2.00    2.00    4.00    4.00    4.00    5.00    3.00    3.00    2.00    2.00    4.00    5.00    1.00    5.00    2.00    5.00    1.00    4.00    3.00    5.00    2.00    2.00    4.00    4.00    1.00    5.00    2.00    5.00    3.38    3.00    3.33    3.40    3.25
    1.00    1.00    3.00    3.00    5.00    5.00    5.00    5.00    5.00    5.00    3.00    5.00    5.00    4.00    4.00    5.00    2.00    5.00    5.00    5.00    5.00    2.00    5.00    5.00    5.00    5.00    5.00    5.00    2.00    5.00    5.00    5.00    4.75    4.44    4.50    4.40    4.54
    1.00    2.00    2.00    3.00    4.00    4.00    4.00    4.00    4.00    3.00    5.00    3.00    4.00    4.00    1.00    5.00    5.00    4.00    5.00    3.00    3.00    5.00    3.00    5.00    4.00    4.00    4.00    4.00    5.00    4.00    5.00    3.00    3.88    3.78    4.17    4.20    3.96
    1.00    1.00    3.00     .00    5.00    5.00    5.00    5.00    4.00    4.00    5.00    5.00    5.00    5.00    5.00    5.00    4.00    5.00    5.00    4.00    4.00    4.00    5.00    2.00    5.00    5.00    5.00    5.00    4.00    5.00    5.00    4.00    4.75    4.67    4.33    4.60    4.61
    1.00    1.00    3.00     .00    4.00    3.00    4.00    4.00    5.00    4.00    3.00    5.00    4.00    5.00    5.00    5.00    5.00    3.00    5.00    5.00    4.00    5.00    4.00    5.00    4.00    3.00    4.00    4.00    5.00    3.00    5.00    5.00    4.00    4.56    4.17    4.40    4.29
    1.00    1.00    3.00     .00    4.00    4.00    5.00    5.00    4.00    4.00    3.00    4.00    4.00    3.00    4.00    4.00    4.00    3.00    5.00    4.00    4.00    4.00    4.00    4.00    4.00    4.00    5.00    5.00    4.00    3.00    5.00    4.00    4.13    3.89    4.17    4.20    4.07
    1.00    2.00    2.00    3.00    4.00    2.00    4.00    5.00    4.00    4.00    3.00    5.00    2.00    4.00    3.00    4.00    4.00    3.00    4.00    3.00    3.00    4.00    4.00    4.00    4.00    2.00    4.00    5.00    4.00    3.00    4.00    3.00    3.88    3.33    3.67    3.80    3.64
    1.00    1.00    3.00    3.00    1.00    5.00    5.00    4.00    5.00    5.00    4.00    2.00    1.00    1.00    3.00    2.00    3.00    4.00    5.00    4.00    5.00    5.00    3.00    2.00    1.00    5.00    5.00    4.00    3.00    4.00    5.00    4.00    3.88    3.11    3.50    4.00    3.57
    1.00    2.00    2.00    3.00    3.00    5.00    5.00    4.00    5.00    2.00    1.00    4.00    1.00    4.00    1.00    4.00    2.00    2.00    3.00    4.00    2.00    4.00    3.00    5.00    3.00    5.00    5.00    4.00    2.00    2.00    3.00    4.00    3.63    2.56    4.17    3.00    3.29
    1.00    2.00    3.00    3.00    4.00    5.00    5.00    4.00    4.00    1.00    1.00    4.00    1.00    4.00    2.00    5.00    4.00    4.00    4.00    4.00    4.00    4.00    4.00    4.00    4.00    5.00    5.00    4.00    4.00    4.00    4.00    4.00    3.50    3.56    4.33    4.00    3.79
    1.00    2.00    3.00    3.00    4.00    4.00    5.00    5.00    2.00    1.00    3.00    5.00    4.00    1.00    5.00    5.00    2.00    5.00    5.00    5.00    5.00    5.00    1.00    5.00    4.00    4.00    5.00    5.00    2.00    5.00    5.00    5.00    3.63    4.11    4.00    4.40    4.00
    2.00    1.00    3.00    3.00    5.00    5.00    5.00    5.00    5.00    5.00    5.00    5.00    5.00    5.00    5.00    5.00    5.00    5.00    5.00    5.00    5.00    5.00    5.00    5.00    5.00    5.00    5.00    5.00    5.00    5.00    5.00    5.00    5.00    5.00    5.00    5.00    5.00
    2.00    1.00    3.00    3.00    5.00    5.00    5.00    5.00    5.00    5.00    4.00    5.00    3.00    4.00    5.00    5.00    1.00    1.00    5.00    5.00    5.00    1.00    5.00    5.00    5.00    5.00    5.00    5.00    1.00    1.00    5.00    5.00    4.88    3.78    4.33    3.40    4.14
    1.00    2.00    3.00    3.00    4.00    4.00    4.00    4.00    5.00    4.00    2.00    4.00    2.00    4.00    4.00    4.00    2.00    2.00    2.00    4.00    3.00    2.00    2.00    2.00    4.00    4.00    4.00    4.00    2.00    2.00    2.00    4.00    3.88    3.00    3.00    2.80    3.21
    1.00    2.00    2.00    3.00    4.00    5.00    4.00    3.00    3.00    5.00    4.00    4.00    5.00    3.00    4.00    2.00    2.00    1.00    3.00    3.00    3.00    2.00    1.00    5.00    4.00    5.00    4.00    3.00    2.00    1.00    3.00    3.00    4.00    2.89    3.50    2.40    3.25
    1.00    2.00    3.00     .00    1.00    5.00    5.00    4.00    4.00    1.00    3.00    4.00    3.00    5.00    4.00    5.00    5.00    4.00    5.00    4.00    5.00    4.00    4.00    4.00    1.00    5.00    5.00    4.00    5.00    4.00    5.00    4.00    3.38    4.44    3.83    4.40    4.00
    2.00    2.00    1.00     .00    3.00    4.00    3.00    5.00    2.00    3.00    3.00    4.00    2.00    3.00    2.00    5.00    4.00    5.00    3.00    4.00    3.00    3.00    4.00    3.00    3.00    4.00    3.00    5.00    4.00    5.00    3.00    4.00    3.38    3.44    3.33    4.20    3.54
    1.00    2.00    1.00    3.00    5.00    5.00    5.00    5.00    5.00    5.00    5.00    3.00    1.00    1.00    4.00    5.00    1.00    1.00    1.00    1.00    1.00    1.00    1.00    1.00    5.00    5.00    5.00    5.00    1.00    1.00    1.00    1.00    4.75    1.78    3.00    1.80    2.89
    1.00    1.00    1.00    3.00    5.00    1.00    2.00    4.00    2.00    3.00    2.00    3.00    3.00    3.00    2.00    2.00    3.00    2.00    1.00    2.00    5.00    2.00    2.00    1.00    5.00    1.00    2.00    4.00    3.00    2.00    1.00    2.00    2.75    2.56    2.17    2.40    2.50
    1.00    2.00    3.00     .00    3.00    4.00    5.00    5.00    5.00    2.00    1.00    5.00    1.00    3.00    3.00    4.00    2.00    3.00    5.00    4.00    5.00    4.00    3.00    4.00    3.00    4.00    5.00    5.00    2.00    3.00    5.00    4.00    3.75    3.33    3.83    3.80    3.64
    1.00    2.00    3.00    3.00    4.00    5.00    5.00    5.00    4.00    5.00    2.00    5.00    2.00    3.00    5.00    3.00    4.00    3.00    4.00    4.00    4.00    4.00    4.00    3.00    4.00    5.00    5.00    5.00    4.00    3.00    4.00    4.00    4.38    3.56    4.17    4.00    4.00
    1.00    2.00    3.00    3.00    5.00    5.00    5.00    5.00    5.00    3.00    5.00    5.00    5.00    5.00    5.00    5.00    1.00    5.00    5.00    5.00    5.00    5.00    3.00    5.00    5.00    5.00    5.00    5.00    1.00    5.00    5.00    5.00    4.75    4.56    4.67    4.20    4.57
    1.00    2.00    3.00     .00    4.00    4.00    4.00    4.00    4.00    2.00    3.00    5.00    4.00    3.00    4.00    4.00    4.00    5.00    5.00    5.00    4.00    4.00    3.00    5.00    4.00    4.00    4.00    4.00    4.00    5.00    5.00    5.00    3.75    4.22    4.00    4.60    4.11
    2.00    1.00    3.00    3.00    5.00    5.00    5.00    4.00    5.00    4.00    4.00    5.00    4.00    4.00    2.00    3.00    4.00    1.00    4.00    4.00    4.00    5.00    5.00    3.00    5.00    5.00    5.00    4.00    4.00    1.00    4.00    4.00    4.63    3.33    4.67    3.40    4.00
    1.00    2.00    3.00    3.00    5.00    5.00    5.00    4.00    5.00    3.00    2.00    4.00    2.00    4.00    3.00    5.00    3.00    3.00    5.00    3.00    2.00    3.00    4.00    5.00    5.00    5.00    5.00    4.00    3.00    3.00    5.00    3.00    4.13    3.33    4.50    3.60    3.86
    1.00    1.00    3.00    3.00    5.00    3.00    5.00    5.00    5.00    3.00    4.00    4.00    4.00    5.00    4.00    5.00    3.00    5.00    5.00    5.00    4.00    5.00    4.00    5.00    5.00    3.00    5.00    5.00    3.00    5.00    5.00    5.00    4.25    4.44    4.50    4.60    4.43
    1.00    2.00    1.00     .00    3.00    4.00    3.00    4.00    3.00    3.00    3.00    4.00    4.00    3.00    4.00    3.00    3.00    4.00    4.00    3.00    3.00    3.00    3.00    3.00    3.00    4.00    3.00    4.00    3.00    4.00    4.00    3.00    3.38    3.44    3.17    3.60    3.39
    1.00    2.00    3.00    3.00    5.00    5.00    5.00    4.00    5.00    5.00    2.00    5.00    3.00    1.00    4.00    4.00    3.00    5.00    4.00    5.00    3.00    4.00    4.00    4.00    5.00    5.00    5.00    4.00    3.00    5.00    4.00    5.00    4.50    3.56    4.50    4.20    4.14
    1.00    1.00    2.00    3.00    4.00    4.00    4.00    5.00    4.00    3.00    3.00    4.00    4.00    4.00    2.00    4.00    2.00    1.00    2.00    3.00    3.00    1.00    1.00    5.00    4.00    4.00    4.00    5.00    2.00    1.00    2.00    3.00    3.88    2.78    3.17    2.60    3.14
    1.00    2.00    2.00    3.00    5.00    4.00    5.00    5.00    4.00    4.00    5.00    5.00    5.00    5.00    4.00    5.00    4.00    3.00    5.00    5.00    5.00    4.00    5.00    4.00    5.00    4.00    5.00    5.00    4.00    3.00    5.00    5.00    4.63    4.56    4.50    4.40    4.54
    1.00    1.00    3.00    3.00    4.00    4.00    4.00    4.00    4.00    4.00    4.00    4.00    5.00    5.00    4.00    3.00    4.00    4.00    4.00    4.00    4.00    3.00    3.00    5.00    4.00    4.00    4.00    4.00    4.00    4.00    4.00    4.00    4.00    4.11    3.83    4.00    4.00
    1.00    2.00    3.00    3.00    5.00    1.00    5.00    5.00    1.00    5.00    5.00    5.00    1.00    5.00    1.00    5.00    1.00    5.00    5.00    5.00    5.00    5.00    2.00    2.00    5.00    1.00    5.00    5.00    1.00    5.00    5.00    5.00    4.00    3.67    3.33    4.20    3.79
    1.00    2.00    1.00     .00    5.00    5.00    5.00    5.00    4.00    1.00    4.00    5.00    3.00    2.00    1.00    5.00    5.00    4.00    4.00    4.00    4.00    1.00    1.00    3.00    5.00    5.00    5.00    5.00    5.00    4.00    4.00    4.00    4.25    3.56    3.33    4.40    3.86
    2.00    2.00    3.00    3.00    5.00    4.00    5.00    5.00    4.00    3.00    4.00    5.00    5.00    5.00    4.00    5.00    5.00    4.00    5.00    4.00    5.00    5.00    4.00    3.00    5.00    4.00    5.00    5.00    5.00    4.00    5.00    4.00    4.38    4.67    4.33    4.60    4.50
    1.00    1.00    1.00     .00    5.00    5.00    4.00    4.00    4.00    4.00    5.00    5.00    5.00    2.00    3.00    5.00    1.00    4.00    2.00    5.00    4.00    4.00    5.00    4.00    5.00    5.00    4.00    4.00    1.00    4.00    2.00    5.00    4.50    3.44    4.50    3.20    3.93
    1.00    2.00    2.00    3.00    4.00    3.00    4.00    4.00    3.00    3.00    3.00    4.00    3.00    4.00    3.00    3.00    4.00    3.00    4.00    3.00    3.00    4.00    4.00    5.00    4.00    3.00    4.00    4.00    4.00    3.00    4.00    3.00    3.50    3.33    4.00    3.60    3.57
    2.00    1.00    3.00     .00    5.00    4.00    5.00    4.00    4.00    5.00    5.00    5.00    5.00    5.00    4.00    4.00    4.00    2.00    5.00    5.00    5.00    5.00    4.00    2.00    5.00    4.00    5.00    4.00    4.00    2.00    5.00    5.00    4.63    4.33    4.17    4.00    4.32
    1.00    2.00    3.00    3.00    3.00    3.00    4.00    5.00    5.00    3.00    1.00    5.00    5.00    5.00    4.00    4.00    4.00    4.00    4.00    4.00    4.00    4.00    4.00    4.00    3.00    3.00    4.00    5.00    4.00    4.00    4.00    4.00    3.63    4.22    3.67    4.20    3.93
    1.00    2.00    3.00    3.00    4.00    4.00    5.00    5.00    4.00    5.00    5.00    5.00    5.00    5.00    3.00    2.00    4.00    5.00    5.00    5.00    4.00    5.00    5.00    5.00    4.00    4.00    5.00    5.00    4.00    5.00    5.00    5.00    4.63    4.22    4.67    4.80    4.54
    1.00    2.00    3.00    3.00    5.00    5.00    5.00    5.00    5.00    5.00    3.00    4.00    3.00    4.00    3.00    3.00    4.00    5.00    5.00    5.00    5.00    4.00    3.00    3.00    5.00    5.00    5.00    5.00    4.00    5.00    5.00    5.00    4.63    4.11    4.17    4.80    4.39
    2.00    2.00    2.00    3.00    3.00    1.00    5.00    5.00    5.00    5.00    5.00    5.00    5.00    5.00    5.00    5.00    5.00    5.00    5.00    5.00    5.00    5.00    5.00    5.00    3.00    1.00    5.00    5.00    5.00    5.00    5.00    5.00    4.25    5.00    4.00    5.00    4.57
    1.00    2.00    1.00     .00    4.00    3.00    3.00    3.00    2.00    2.00    4.00    4.00    4.00    4.00    4.00    4.00    4.00    4.00    4.00    4.00    4.00    4.00    4.00    4.00    4.00    3.00    3.00    3.00    4.00    4.00    4.00    4.00    3.13    4.00    3.67    3.80    3.64
    2.00    1.00    3.00     .00    4.00    3.00    3.00    4.00    3.00    2.00    2.00    4.00    2.00    2.00    3.00    3.00    3.00    3.00    3.00    4.00    3.00    3.00    2.00    3.00    4.00    3.00    3.00    4.00    3.00    3.00    3.00    4.00    3.13    2.89    3.00    3.40    3.07
    1.00    2.00    3.00    3.00    5.00    5.00    5.00    5.00    5.00    5.00    3.00    5.00    3.00    4.00    3.00    5.00    4.00    3.00    3.00    4.00    3.00    4.00    5.00    5.00    5.00    5.00    5.00    5.00    4.00    3.00    3.00    4.00    4.75    3.56    4.83    3.80    4.21
    1.00    2.00    3.00    3.00    4.00    5.00    5.00    5.00    4.00    5.00    5.00    5.00    5.00    5.00    3.00    3.00    4.00    5.00    5.00    4.00    5.00    4.00    3.00    4.00    4.00    5.00    5.00    5.00    4.00    5.00    5.00    4.00    4.75    4.33    4.17    4.60    4.46
    1.00    2.00    3.00    3.00    4.00    3.00    5.00    5.00    4.00    2.00    3.00    4.00    3.00    5.00    4.00    5.00    5.00    4.00    4.00    4.00    4.00    4.00    4.00    4.00    4.00    3.00    5.00    5.00    5.00    4.00    4.00    4.00    3.75    4.22    4.00    4.40    4.07
    1.00    1.00    3.00    3.00    5.00    4.00    5.00    5.00    5.00    4.00    4.00    5.00    4.00    4.00    3.00    5.00    4.00    4.00    4.00    4.00    4.00    3.00    3.00    4.00    5.00    4.00    5.00    5.00    4.00    4.00    4.00    4.00    4.63    4.00    4.00    4.20    4.21
    1.00    2.00    3.00    3.00    4.00    5.00    4.00    5.00    5.00    3.00    4.00    5.00    3.00    4.00    4.00    4.00    5.00    5.00    5.00    5.00    5.00    5.00    5.00    3.00    4.00    5.00    4.00    5.00    5.00    5.00    5.00    5.00    4.38    4.44    4.33    5.00    4.50
    2.00    2.00    2.00    3.00    5.00    5.00    5.00    5.00    5.00    5.00    5.00    5.00    5.00    5.00    5.00    5.00    5.00    5.00    5.00    5.00    5.00    4.00    5.00    5.00    5.00    5.00    5.00    5.00    5.00    5.00    5.00    5.00    5.00    5.00    4.83    5.00    4.96
    1.00    1.00    3.00    3.00    5.00    5.00    5.00    5.00    5.00    4.00    5.00    5.00    4.00    5.00    5.00    5.00    5.00    5.00    5.00    5.00    5.00    4.00    5.00    5.00    5.00    5.00    5.00    5.00    5.00    5.00    5.00    5.00    4.88    4.89    4.83    5.00    4.89
    2.00    1.00    2.00    2.00    5.00    5.00    5.00    5.00    5.00    5.00    5.00    5.00    5.00    5.00    5.00    5.00    5.00    5.00    5.00    5.00    5.00    5.00    5.00    5.00    5.00    5.00    5.00    5.00    5.00    5.00    5.00    5.00    5.00    5.00    5.00    5.00    5.00
    1.00    2.00    3.00    3.00    5.00    5.00    5.00    5.00    4.00    3.00    5.00    4.00    5.00    5.00    5.00    5.00    5.00    4.00    5.00    5.00    5.00    5.00    5.00    4.00    5.00    5.00    5.00    5.00    5.00    4.00    5.00    5.00    4.50    4.89    4.83    4.80    4.75
    1.00    2.00    3.00    3.00    4.00    4.00    4.00    3.00    4.00    3.00    3.00    4.00    3.00    4.00    4.00    4.00    4.00    3.00    4.00    5.00    3.00    4.00    5.00    3.00    4.00    4.00    4.00    3.00    4.00    3.00    4.00    5.00    3.63    3.78    4.00    3.80    3.79
    1.00    1.00    3.00     .00    4.00    5.00    4.00    4.00    5.00    3.00    2.00    4.00    3.00    4.00    3.00    4.00    4.00    3.00    4.00    4.00    4.00    5.00    5.00    3.00    4.00    5.00    4.00    4.00    4.00    3.00    4.00    4.00    3.88    3.67    4.33    3.80    3.89
    1.00    2.00    3.00     .00    4.00    4.00    5.00    5.00    4.00    3.00    5.00    5.00    5.00    4.00    3.00    4.00    5.00    3.00    4.00    4.00    3.00    4.00    4.00    4.00    4.00    4.00    5.00    5.00    5.00    3.00    4.00    4.00    4.38    3.89    4.17    4.20    4.14
    2.00    2.00    3.00    3.00    5.00    1.00    5.00    4.00    3.00    5.00    1.00    5.00    1.00    5.00    5.00    5.00    4.00    5.00    5.00    5.00    4.00    4.00    4.00    5.00    5.00    1.00    5.00    4.00    4.00    5.00    5.00    5.00    3.63    4.33    4.00    4.60    4.11
    1.00    1.00    3.00     .00    4.00    5.00    5.00    5.00    5.00    5.00    4.00    4.00    4.00    4.00    4.00    4.00    4.00    4.00    5.00    5.00    4.00    4.00    4.00    5.00    4.00    5.00    5.00    5.00    4.00    4.00    5.00    5.00    4.63    4.22    4.50    4.60    4.46
    1.00    1.00    3.00     .00    5.00    5.00    5.00    5.00    4.00    5.00    5.00    5.00    5.00    4.00    4.00    5.00    5.00    4.00    4.00    5.00    4.00    3.00    3.00    3.00    5.00    5.00    5.00    5.00    5.00    4.00    4.00    5.00    4.88    4.44    4.00    4.60    4.50
    1.00    1.00    3.00     .00    5.00    5.00    4.00    4.00    4.00    3.00    4.00    5.00    4.00    5.00    4.00    3.00    4.00    3.00    5.00    4.00    4.00    4.00    4.00    3.00    5.00    5.00    4.00    4.00    4.00    3.00    5.00    4.00    4.25    4.00    4.17    4.00    4.11
    1.00    2.00    1.00     .00    5.00    4.00    4.00    5.00    5.00    5.00    5.00    5.00    3.00    4.00    5.00    5.00    5.00    5.00    5.00    5.00    5.00    5.00    5.00    5.00    5.00    4.00    4.00    5.00    5.00    5.00    5.00    5.00    4.75    4.67    4.67    5.00    4.75
    1.00    2.00    3.00     .00    4.00    5.00    5.00    4.00    4.00    5.00    3.00    5.00    3.00    4.00    4.00    4.00    4.00    3.00    5.00    4.00    4.00    5.00    4.00    3.00    4.00    5.00    5.00    4.00    4.00    3.00    5.00    4.00    4.38    3.89    4.33    4.00    4.14
    1.00    2.00    1.00    3.00    4.00    5.00    4.00    4.00    4.00    4.00    2.00    4.00    2.00    4.00    4.00    4.00    4.00    4.00    4.00    4.00    4.00    4.00    4.00    3.00    4.00    5.00    4.00    4.00    4.00    4.00    4.00    4.00    3.88    3.78    4.00    4.00    3.89
    1.00    1.00    3.00     .00    5.00    5.00    4.00    4.00    4.00    4.00    3.00    5.00    3.00    5.00    3.00    3.00    5.00    3.00    5.00    5.00    4.00    5.00    4.00    3.00    5.00    5.00    4.00    4.00    5.00    3.00    5.00    5.00    4.25    4.00    4.33    4.40    4.21
    1.00    2.00    3.00    3.00    5.00    5.00    3.00    4.00    5.00    5.00    5.00    5.00    5.00    5.00    5.00    5.00    4.00    2.00    5.00    3.00    5.00    5.00    5.00    2.00    5.00    5.00    3.00    4.00    4.00    2.00    5.00    3.00    4.63    4.33    4.17    3.60    4.25
    1.00    1.00    3.00     .00    4.00    5.00    4.00    5.00    5.00    4.00    3.00    5.00    1.00    4.00    1.00    3.00    5.00    3.00    4.00    5.00    4.00    4.00    4.00    4.00    4.00    5.00    4.00    5.00    5.00    3.00    4.00    5.00    4.38    3.33    4.17    4.40    4.00
    1.00    2.00    2.00    3.00    2.00    3.00    3.00    4.00    3.00    3.00    3.00    4.00    3.00    3.00    1.00    4.00    3.00    1.00    1.00    1.00    1.00    1.00    4.00    3.00    2.00    3.00    3.00    4.00    3.00    1.00    1.00    1.00    3.13    2.00    2.67    2.00    2.46
    2.00    1.00    2.00    1.00    3.00    4.00    3.00    4.00    3.00    2.00    5.00    1.00    5.00    5.00    4.00    2.00    1.00    3.00    2.00    2.00    5.00    3.00    1.00    4.00    3.00    4.00    3.00    4.00    1.00    3.00    2.00    2.00    3.13    3.22    3.00    2.40    3.00
    1.00    1.00    2.00    3.00    4.00    5.00    5.00    5.00    3.00    3.00    3.00    5.00    2.00    5.00    5.00    5.00    5.00    2.00    5.00    5.00    5.00    4.00    2.00    3.00    4.00    5.00    5.00    5.00    5.00    2.00    5.00    5.00    4.13    4.33    3.83    4.40    4.18
    1.00    2.00    1.00    3.00    3.00    5.00    4.00    3.00    3.00    3.00    4.00    3.00    3.00    4.00    3.00    3.00    3.00    3.00    3.00    4.00    3.00    3.00    3.00    3.00    3.00    5.00    4.00    3.00    3.00    3.00    3.00    4.00    3.50    3.22    3.50    3.20    3.36
    1.00    1.00    2.00    2.00    5.00    4.00    3.00    5.00    3.00    2.00    1.00    3.00    2.00    3.00    2.00    2.00    2.00    2.00    2.00    4.00    4.00    2.00    2.00    4.00    5.00    4.00    3.00    5.00    2.00    2.00    2.00    4.00    3.25    2.56    3.33    3.00    3.00
    1.00    1.00    1.00    3.00    4.00    5.00    4.00    4.00    4.00    4.00    3.00    3.00    4.00    1.00    2.00    3.00    2.00    3.00    4.00    3.00    4.00    3.00    3.00    4.00    4.00    5.00    4.00    4.00    2.00    3.00    4.00    3.00    3.88    2.89    3.83    3.20    3.43
    2.00    2.00    2.00    3.00    5.00    4.00    4.00    4.00    3.00    3.00    4.00    5.00    2.00    4.00    3.00    4.00    4.00    4.00    4.00    5.00    5.00    4.00    4.00    4.00    5.00    4.00    4.00    4.00    4.00    4.00    4.00    5.00    4.00    3.89    4.17    4.20    4.04
    2.00    1.00    2.00    2.00    5.00    2.00    5.00    5.00    3.00    3.00    1.00    1.00    1.00    5.00    4.00    5.00    1.00    1.00    1.00    1.00    1.00    1.00    3.00    5.00    5.00    2.00    5.00    5.00    1.00    1.00    1.00    1.00    3.13    2.22    3.50    1.80    2.68
    2.00    2.00    2.00    3.00    3.00    5.00    5.00    5.00    5.00    5.00    5.00    5.00    5.00    5.00    5.00    5.00    5.00    5.00    5.00    5.00    5.00    5.00    5.00    5.00    3.00    5.00    5.00    5.00    5.00    5.00    5.00    5.00    4.75    5.00    4.67    5.00    4.86
    1.00    1.00    3.00    3.00    5.00    5.00    5.00    5.00    5.00    5.00    4.00    5.00    4.00    5.00    4.00    5.00    4.00    5.00    4.00    5.00    5.00    5.00    4.00    4.00    5.00    5.00    5.00    5.00    4.00    5.00    4.00    5.00    4.88    4.56    4.67    4.60    4.68
    2.00    2.00    1.00     .00    2.00    5.00    5.00    5.00    5.00    3.00    1.00    5.00    1.00    5.00    1.00    5.00    1.00    1.00    1.00    5.00    5.00    1.00    5.00    1.00    2.00    5.00    5.00    5.00    1.00    1.00    1.00    5.00    3.88    2.78    3.17    2.60    3.14
    1.00    2.00    3.00    3.00    5.00    5.00    5.00    5.00    5.00    5.00    5.00    5.00    5.00    5.00    5.00    5.00    5.00    5.00    5.00    5.00    5.00    5.00    5.00    2.00    5.00    5.00    5.00    5.00    5.00    5.00    5.00    5.00    5.00    5.00    4.50    5.00    4.89
    2.00    2.00    2.00    3.00    4.00    4.00    5.00    4.00    3.00    4.00    3.00    4.00    4.00    4.00    2.00    4.00    3.00    4.00    4.00    4.00    4.00    4.00    5.00    3.00    4.00    4.00    5.00    4.00    3.00    4.00    4.00    4.00    3.88    3.67    4.17    3.80    3.86
    1.00    2.00    2.00    3.00    5.00    5.00    5.00    5.00    5.00    5.00    4.00    4.00    3.00    4.00    3.00    5.00    3.00    4.00    4.00    4.00    5.00    3.00    4.00    4.00    5.00    5.00    5.00    5.00    3.00    4.00    4.00    4.00    4.75    3.89    4.33    4.00    4.25
    1.00    2.00    1.00    3.00    5.00    4.00    4.00    4.00    4.00    5.00    4.00    4.00    4.00    4.00    1.00    4.00    4.00    4.00    4.00    4.00    4.00    4.00    2.00    5.00    5.00    4.00    4.00    4.00    4.00    4.00    4.00    4.00    4.25    3.67    4.00    4.00    3.96
    1.00    2.00    3.00    2.00    3.00    4.00    4.00    4.00    3.00    2.00    2.00    4.00    3.00    3.00    4.00    3.00    3.00    3.00    3.00    3.00    4.00    5.00    4.00    4.00    3.00    4.00    4.00    4.00    3.00    3.00    3.00    3.00    3.25    3.22    4.00    3.20    3.39
    1.00    2.00    1.00    3.00    5.00    5.00    5.00    5.00    5.00    5.00    3.00    1.00    3.00    3.00    5.00    5.00    5.00    5.00    5.00    5.00    5.00    5.00    5.00    5.00    5.00    5.00    5.00    5.00    5.00    5.00    5.00    5.00    4.25    4.56    5.00    5.00    4.64
    2.00    2.00    1.00     .00    5.00    5.00    4.00    5.00    4.00    3.00    1.00    5.00    1.00    4.00    4.00    5.00    5.00    5.00    5.00    5.00    4.00    5.00    1.00    4.00    5.00    5.00    4.00    5.00    5.00    5.00    5.00    5.00    4.00    4.22    4.00    5.00    4.25
    1.00    2.00    3.00    3.00    4.00    4.00    4.00    5.00    4.00    4.00    4.00    4.00    4.00    5.00    4.00    4.00    4.00    5.00    5.00    4.00    4.00    4.00    4.00    4.00    4.00    4.00    4.00    5.00    4.00    5.00    5.00    4.00    4.13    4.33    4.00    4.60    4.25
    1.00    2.00    3.00     .00    4.00    5.00    5.00    4.00    4.00    4.00    5.00    4.00    5.00    4.00    4.00    4.00    4.00    5.00    5.00    4.00    5.00    4.00    4.00    4.00    4.00    5.00    5.00    4.00    4.00    5.00    5.00    4.00    4.38    4.44    4.33    4.40    4.39
    1.00    2.00    3.00    3.00    4.00    5.00    5.00    5.00    4.00    4.00    5.00    5.00    5.00    5.00    3.00    5.00    5.00    5.00    5.00    5.00    5.00    5.00    3.00    4.00    4.00    5.00    5.00    5.00    5.00    5.00    5.00    5.00    4.63    4.78    4.33    5.00    4.68
    1.00    2.00    2.00    3.00    3.00    5.00    4.00    4.00    5.00    4.00    3.00    4.00    4.00    5.00    4.00    4.00    3.00    4.00    4.00    4.00    3.00    4.00    5.00    4.00    3.00    5.00    4.00    4.00    3.00    4.00    4.00    4.00    4.00    3.89    4.17    3.80    3.96
    1.00    2.00    3.00    3.00    5.00    5.00    5.00    5.00    4.00    3.00    5.00    5.00    1.00    1.00    1.00    1.00    1.00    1.00    1.00    1.00    1.00    1.00    1.00    1.00    5.00    5.00    5.00    5.00    1.00    1.00    1.00    1.00    4.63    1.00    3.00    1.80    2.61
    1.00    2.00    3.00     .00    3.00    4.00    4.00    4.00    2.00    3.00    3.00    4.00    3.00    4.00    3.00    2.00    2.00    3.00    4.00    4.00    4.00    3.00    3.00    4.00    3.00    4.00    4.00    4.00    2.00    3.00    4.00    4.00    3.38    3.22    3.50    3.40    3.36
    2.00    2.00    3.00    3.00    1.00    1.00    1.00    1.00    1.00    1.00    1.00    1.00    2.00    2.00    2.00    1.00    1.00    1.00    1.00    1.00    1.00    1.00    1.00    1.00    1.00    1.00    1.00    1.00    1.00    1.00    1.00    1.00    1.00    1.33    1.00    1.00    1.11
    1.00    2.00    3.00     .00    5.00    5.00    5.00    5.00    5.00    3.00    1.00    5.00    2.00    4.00    5.00    5.00    5.00    1.00    5.00    5.00    1.00    5.00    3.00    5.00    5.00    5.00    5.00    5.00    5.00    1.00    5.00    5.00    4.25    3.67    4.67    4.20    4.14
    2.00    1.00    2.00    3.00    5.00    4.00    5.00    4.00    4.00    4.00    5.00    5.00    4.00    5.00    4.00    4.00    5.00    5.00    5.00    5.00    4.00    4.00    4.00    4.00    5.00    4.00    5.00    4.00    5.00    5.00    5.00    5.00    4.50    4.56    4.33    4.80    4.54
    1.00    2.00    3.00    3.00    5.00    5.00    5.00    5.00    5.00    5.00    5.00    5.00    4.00    4.00    2.00    5.00    5.00    2.00    4.00    5.00    5.00    2.00    4.00    4.00    5.00    5.00    5.00    5.00    5.00    2.00    4.00    5.00    5.00    4.00    4.17    4.20    4.36
    1.00    2.00    3.00    3.00    5.00    3.00    5.00    5.00    5.00    4.00    3.00    5.00    3.00    5.00    3.00    5.00    5.00    5.00    5.00    5.00    4.00    4.00    4.00    3.00    5.00    3.00    5.00    5.00    5.00    5.00    5.00    5.00    4.38    4.44    4.00    5.00    4.43
    1.00    2.00    3.00     .00    4.00    5.00    4.00    3.00    4.00    3.00    3.00    5.00    3.00    3.00    3.00    5.00    4.00    4.00    5.00    3.00    2.00    5.00    5.00    5.00    4.00    5.00    4.00    3.00    4.00    4.00    5.00    3.00    3.88    3.56    4.67    3.80    3.93
    1.00    2.00    1.00    3.00    4.00    3.00    5.00    5.00    4.00    5.00    4.00    5.00    4.00    4.00    3.00    5.00    4.00    4.00    4.00    4.00    4.00    5.00    4.00    3.00    4.00    3.00    5.00    5.00    4.00    4.00    4.00    4.00    4.38    4.00    4.00    4.20    4.14
    1.00    1.00    3.00     .00    5.00    5.00    5.00    4.00    4.00    3.00    2.00    4.00    2.00    2.00    3.00    4.00    3.00    3.00    4.00    4.00    5.00    4.00    4.00    4.00    5.00    5.00    5.00    4.00    3.00    3.00    4.00    4.00    4.00    3.33    4.50    3.60    3.82
    1.00    2.00    3.00    3.00    4.00    1.00    4.00    5.00    4.00    3.00    3.00    4.00    3.00    4.00    4.00    5.00    3.00    4.00    4.00    4.00    5.00    4.00    4.00    5.00    4.00    1.00    4.00    5.00    3.00    4.00    4.00    4.00    3.50    4.00    3.67    4.00    3.79
    2.00    1.00    3.00    3.00    4.00    4.00    5.00    5.00    5.00    1.00    1.00    4.00    3.00    5.00    1.00    3.00    4.00    4.00    4.00    3.00    5.00    4.00    4.00    3.00    4.00    4.00    5.00    5.00    4.00    4.00    4.00    3.00    3.63    3.56    4.00    4.00    3.75
    1.00    2.00    1.00    3.00    5.00    5.00    5.00    5.00    4.00    3.00    1.00    5.00    1.00    1.00    2.00    5.00    5.00    5.00    5.00    3.00    3.00    4.00    5.00    5.00    5.00    5.00    5.00    5.00    5.00    5.00    5.00    3.00    4.13    3.33    4.83    4.60    4.11
    1.00    2.00    1.00    3.00    5.00    5.00    5.00    5.00    5.00    3.00    1.00    5.00    1.00    1.00    5.00    4.00    3.00    5.00    5.00    5.00    5.00    2.00    5.00    5.00    5.00    5.00    5.00    5.00    3.00    5.00    5.00    5.00    4.25    3.78    4.50    4.60    4.21
    1.00    2.00    1.00    3.00    5.00    5.00    4.00    5.00    4.00    5.00    1.00    4.00    3.00    4.00    1.00    5.00    4.00    4.00    4.00    4.00    4.00    4.00    4.00    4.00    5.00    5.00    4.00    5.00    4.00    4.00    4.00    4.00    4.13    3.67    4.33    4.20    4.04
    1.00    2.00    3.00    2.00    5.00    5.00    5.00    5.00    5.00    3.00    4.00    4.00    4.00    5.00    2.00    4.00    5.00    4.00    5.00    4.00    5.00    4.00    5.00    4.00    5.00    5.00    5.00    5.00    5.00    4.00    5.00    4.00    4.50    4.22    4.67    4.60    4.46
    1.00    1.00    1.00    3.00    3.00    2.00    4.00    1.00    4.00    3.00    5.00    5.00    2.00    5.00    1.00    3.00    2.00    5.00    5.00    4.00    3.00    5.00    3.00    5.00    3.00    2.00    4.00    1.00    2.00    5.00    5.00    4.00    3.38    3.33    3.67    3.40    3.43
    1.00    2.00    3.00    3.00    5.00    5.00    5.00    4.00    5.00    5.00    1.00    5.00    2.00    3.00    1.00    4.00    4.00    2.00    2.00    4.00    2.00    1.00    4.00    5.00    5.00    5.00    5.00    4.00    4.00    2.00    2.00    4.00    4.38    2.67    4.17    3.20    3.57
    1.00    2.00    3.00    3.00    3.00    2.00    4.00    4.00    3.00    3.00    4.00    5.00    5.00    4.00    5.00    4.00    3.00    4.00    4.00    4.00    4.00    4.00    4.00    5.00    3.00    2.00    4.00    4.00    3.00    4.00    4.00    4.00    3.50    4.11    3.67    3.80    3.79
    1.00    2.00    3.00     .00    5.00    5.00    5.00    5.00    5.00    5.00    3.00    5.00    2.00    3.00    3.00    5.00    5.00    5.00    5.00    5.00    5.00    5.00    5.00    5.00    5.00    5.00    5.00    5.00    5.00    5.00    5.00    5.00    4.75    4.22    5.00    5.00    4.68
    1.00    2.00    1.00     .00    3.00    4.00    4.00    5.00    3.00    3.00    3.00    5.00    3.00    2.00    1.00    3.00    2.00    2.00    3.00    4.00    4.00    2.00    4.00    5.00    3.00    4.00    4.00    5.00    2.00    2.00    3.00    4.00    3.75    2.67    3.67    3.20    3.29
    1.00    2.00    3.00    3.00    3.00    3.00    2.00    3.00    1.00    1.00    3.00    3.00    3.00    1.00    2.00    4.00    2.00    2.00    4.00    1.00    3.00    3.00    2.00    3.00    3.00    3.00    2.00    3.00    2.00    2.00    4.00    1.00    2.38    2.44    2.67    2.40    2.46
    1.00    1.00    3.00     .00    4.00    4.00    5.00    4.00    4.00    4.00    5.00    4.00    5.00    4.00    4.00    4.00    4.00    3.00    5.00    4.00    4.00    4.00    4.00    4.00    4.00    4.00    5.00    4.00    4.00    3.00    5.00    4.00    4.25    4.11    4.17    4.00    4.14
    1.00    2.00    2.00    3.00    4.00    4.00    4.00    4.00    4.00    4.00    3.00    4.00    3.00    3.00    2.00    4.00    3.00    4.00    4.00    4.00    4.00    4.00    4.00    4.00    4.00    4.00    4.00    4.00    3.00    4.00    4.00    4.00    3.88    3.44    4.00    3.80    3.75
    1.00    2.00    3.00     .00    5.00    5.00    5.00    5.00    5.00    3.00    2.00    5.00    2.00    3.00    5.00    5.00    5.00    3.00    5.00    5.00    5.00    5.00    4.00    5.00    5.00    5.00    5.00    5.00    5.00    3.00    5.00    5.00    4.38    4.22    4.83    4.60    4.46
    1.00    1.00    3.00    3.00    5.00    4.00    5.00    5.00    4.00    4.00    5.00    5.00    4.00    4.00    5.00    5.00    5.00    4.00    5.00    5.00    5.00    4.00    5.00    4.00    5.00    4.00    5.00    5.00    5.00    4.00    5.00    5.00    4.63    4.67    4.50    4.80    4.64
    1.00    1.00    3.00     .00    4.00    4.00    4.00    4.00    4.00    3.00    3.00    4.00    3.00    4.00    4.00    4.00    4.00    4.00    4.00    4.00    4.00    4.00    4.00    4.00    4.00    4.00    4.00    4.00    4.00    4.00    4.00    4.00    3.75    3.89    4.00    4.00    3.89
    1.00    1.00    3.00     .00    4.00    5.00    4.00    4.00    4.00    4.00    4.00    5.00    4.00    4.00    5.00    4.00    4.00    4.00    4.00    4.00    4.00    5.00    4.00    4.00    4.00    5.00    4.00    4.00    4.00    4.00    4.00    4.00    4.25    4.11    4.33    4.00    4.18
    1.00    2.00    1.00    2.00    4.00    4.00    5.00    5.00    5.00    3.00    3.00    4.00    1.00    4.00    2.00    5.00    1.00    5.00    5.00    4.00    5.00    4.00    4.00    4.00    4.00    4.00    5.00    5.00    1.00    5.00    5.00    4.00    4.13    3.56    4.17    4.00    3.93
    1.00    2.00    3.00    3.00    4.00    5.00    5.00    3.00    3.00    4.00    3.00    4.00    3.00    3.00    1.00    3.00    4.00    3.00    3.00    4.00    4.00    4.00    3.00    3.00    4.00    5.00    5.00    3.00    4.00    3.00    3.00    4.00    3.88    3.11    4.00    3.40    3.57
    2.00    1.00    2.00    1.00    3.00    4.00    3.00    4.00    3.00    2.00    5.00    1.00    5.00    5.00    4.00    2.00    1.00    3.00    2.00    2.00    5.00    3.00    1.00    4.00    3.00    4.00    3.00    4.00    1.00    3.00    2.00    2.00    3.13    3.22    3.00    2.40    3.00
    1.00    2.00    3.00    2.00    5.00    3.00    5.00    5.00    5.00    3.00    3.00    5.00    3.00    5.00    3.00    5.00    4.00    3.00    3.00    4.00    3.00    3.00    4.00    3.00    5.00    3.00    5.00    5.00    4.00    3.00    3.00    4.00    4.25    3.67    3.83    3.80    3.89
    2.00    1.00    3.00    3.00    4.00    4.00    5.00    3.00    3.00    2.00    2.00    4.00    3.00    3.00    4.00    3.00    3.00    3.00    4.00    4.00    3.00    4.00    2.00    4.00    4.00    4.00    5.00    3.00    3.00    3.00    4.00    4.00    3.38    3.33    3.83    3.40    3.46
    1.00    1.00    3.00    3.00    5.00    5.00    4.00    5.00    5.00    1.00    1.00    5.00    1.00    5.00    1.00    5.00    1.00    1.00    1.00    5.00    5.00    1.00    5.00    1.00    5.00    5.00    4.00    5.00    1.00    1.00    1.00    5.00    3.88    2.78    3.50    2.60    3.21
    1.00    1.00    3.00     .00    5.00    5.00    5.00    5.00    4.00    4.00    4.00    5.00    5.00    4.00    4.00    4.00    4.00    4.00    5.00    5.00    5.00    5.00    5.00    4.00    5.00    5.00    5.00    5.00    4.00    4.00    5.00    5.00    4.63    4.44    4.83    4.60    4.61
    2.00    2.00    1.00     .00    5.00    4.00    3.00    4.00    3.00    4.00    3.00    4.00    2.00    4.00    2.00    4.00    3.00    4.00    5.00    3.00    5.00    3.00    2.00    4.00    5.00    4.00    3.00    4.00    3.00    4.00    5.00    3.00    3.75    3.56    3.50    3.80    3.64
    2.00    1.00    3.00    3.00    5.00    5.00    4.00    4.00    3.00    4.00    3.00    3.00    3.00    3.00    4.00    4.00    3.00    3.00    4.00    4.00    4.00    3.00    4.00    4.00    5.00    5.00    4.00    4.00    3.00    3.00    4.00    4.00    3.88    3.56    4.17    3.60    3.79
    1.00    1.00    3.00     .00    5.00    5.00    5.00    5.00    5.00    4.00    5.00    5.00    5.00    4.00    4.00    5.00    5.00    5.00    5.00    5.00    4.00    5.00    5.00    4.00    5.00    5.00    5.00    5.00    5.00    5.00    5.00    5.00    4.88    4.67    4.83    5.00    4.82
    1.00    1.00    3.00     .00    4.00    5.00    4.00    5.00    4.00    3.00    5.00    3.00    3.00    5.00    5.00    4.00    3.00    5.00    5.00    5.00    5.00    5.00    4.00    5.00    4.00    5.00    4.00    5.00    3.00    5.00    5.00    5.00    4.13    4.44    4.50    4.60    4.39
    1.00    1.00    3.00     .00    5.00    5.00    5.00    5.00    5.00    5.00    5.00    5.00    5.00    5.00    4.00    5.00    5.00    5.00    5.00    5.00    4.00    5.00    1.00    5.00    5.00    5.00    5.00    5.00    5.00    5.00    5.00    5.00    5.00    4.78    4.33    5.00    4.79
    1.00    2.00    3.00    3.00    4.00    2.00    4.00    4.00    4.00    2.00    4.00    4.00    4.00    4.00    2.00    4.00    3.00    3.00    3.00    3.00    4.00    3.00    4.00    5.00    4.00    2.00    4.00    4.00    3.00    3.00    3.00    3.00    3.50    3.33    3.67    3.20    3.43
    1.00    1.00    1.00    3.00    5.00    5.00    5.00    5.00    4.00    5.00    4.00    5.00    1.00    5.00    1.00    5.00    5.00    5.00    5.00    5.00    5.00    5.00    5.00    5.00    5.00    5.00    5.00    5.00    5.00    5.00    5.00    5.00    4.75    4.11    5.00    5.00    4.64
    1.00    2.00    3.00    3.00    5.00    5.00    5.00    5.00    5.00    5.00    5.00    5.00    4.00    5.00    5.00    5.00    5.00    5.00    5.00    5.00    5.00    5.00    5.00    5.00    5.00    5.00    5.00    5.00    5.00    5.00    5.00    5.00    5.00    4.89    5.00    5.00    4.96
    1.00    2.00    1.00     .00    5.00    5.00    5.00    4.00    5.00    4.00    3.00    5.00    3.00    3.00    1.00    5.00    5.00    3.00    5.00    5.00    5.00    4.00    2.00    4.00    5.00    5.00    5.00    4.00    5.00    3.00    5.00    5.00    4.50    3.89    4.17    4.40    4.21
    1.00    2.00    1.00     .00    4.00    3.00    5.00    5.00    4.00    3.00    1.00    5.00    1.00    3.00    3.00    5.00    4.00    3.00    4.00    5.00    4.00    4.00    4.00    3.00    4.00    3.00    5.00    5.00    4.00    3.00    4.00    5.00    3.75    3.56    3.83    4.20    3.79
    1.00    1.00    3.00     .00    5.00    5.00    5.00    5.00    5.00    4.00    4.00    5.00    4.00    5.00    3.00    5.00    4.00    5.00    5.00    5.00    5.00    4.00    5.00    5.00    5.00    5.00    5.00    5.00    4.00    5.00    5.00    5.00    4.75    4.56    4.83    4.80    4.71
    1.00    2.00    3.00     .00    4.00    5.00    4.00    5.00    4.00    3.00    2.00    4.00    5.00    3.00    4.00    4.00    3.00    4.00    4.00    3.00    5.00    4.00    4.00    3.00    4.00    5.00    4.00    5.00    3.00    4.00    4.00    3.00    3.88    3.89    4.00    3.80    3.89
    2.00    1.00    3.00     .00    4.00    4.00    5.00    5.00    5.00    3.00    2.00    5.00    1.00    2.00    1.00    5.00    4.00    3.00    5.00    4.00    4.00    1.00    5.00    5.00    4.00    4.00    5.00    5.00    4.00    3.00    5.00    4.00    4.13    3.22    4.00    4.20    3.82
    1.00    2.00    3.00    3.00    5.00    5.00    5.00    5.00    5.00    4.00    5.00    5.00    3.00    5.00    3.00    5.00    1.00    5.00    5.00    5.00    5.00    2.00    5.00    5.00    5.00    5.00    5.00    5.00    1.00    5.00    5.00    5.00    4.88    4.11    4.50    4.20    4.43
    2.00    2.00    3.00     .00    5.00    5.00    5.00    5.00    4.00    5.00    4.00    5.00    5.00    3.00    5.00    5.00    5.00    5.00    5.00    5.00    5.00    5.00    5.00    5.00    5.00    5.00    5.00    5.00    5.00    5.00    5.00    5.00    4.75    4.78    5.00    5.00    4.86
    1.00    1.00    1.00     .00    5.00    1.00    4.00    5.00    3.00    4.00    1.00    5.00    3.00    3.00    1.00    5.00    4.00    2.00    2.00    4.00    3.00    1.00    1.00    3.00    5.00    1.00    4.00    5.00    4.00    2.00    2.00    4.00    3.50    3.00    2.50    3.40    3.11
    1.00    2.00    3.00    3.00    5.00    5.00    5.00    5.00    5.00    5.00    5.00    5.00    5.00    5.00    1.00    5.00    3.00    2.00    3.00    5.00    2.00    3.00    5.00    4.00    5.00    5.00    5.00    5.00    3.00    2.00    3.00    5.00    5.00    3.44    4.50    3.60    4.14
    2.00    2.00    3.00     .00    5.00    5.00    5.00    5.00    5.00    5.00    5.00    5.00    5.00    5.00    5.00    5.00    5.00    5.00    5.00    5.00    5.00    5.00    5.00    5.00    5.00    5.00    5.00    5.00    5.00    5.00    5.00    5.00    5.00    5.00    5.00    5.00    5.00
    1.00    1.00    3.00     .00    4.00    5.00    5.00    4.00    4.00    4.00    4.00    5.00    4.00    4.00    5.00    5.00    5.00    5.00    5.00    5.00    3.00    4.00    4.00    4.00    4.00    5.00    5.00    4.00    5.00    5.00    5.00    5.00    4.38    4.56    4.33    4.80    4.50
    1.00    1.00    1.00     .00    4.00    5.00    4.00    4.00    3.00    3.00    2.00    4.00    2.00    3.00    3.00    4.00    4.00    3.00    4.00    4.00    3.00    3.00    4.00    2.00    4.00    5.00    4.00    4.00    4.00    3.00    4.00    4.00    3.63    3.33    3.67    3.80    3.57
    1.00    2.00    1.00     .00    2.00    4.00    1.00    2.00    3.00    2.00    2.00    2.00    1.00    2.00    2.00    3.00    3.00    3.00    2.00    2.00    2.00    2.00    2.00    5.00    2.00    4.00    1.00    2.00    3.00    3.00    2.00    2.00    2.25    2.22    2.67    2.40    2.36
    2.00    2.00    3.00     .00    3.00    3.00    3.00    4.00    3.00    1.00    3.00    4.00    3.00    3.00    2.00    2.00    3.00    3.00    3.00    3.00    2.00    2.00    4.00    4.00    3.00    3.00    3.00    4.00    3.00    3.00    3.00    3.00    3.00    2.67    3.17    3.20    2.96
    1.00    2.00    1.00    3.00    4.00    5.00    5.00    5.00    5.00    5.00    5.00    5.00    5.00    5.00    5.00    5.00    4.00    4.00    4.00    4.00    4.00    4.00    4.00    5.00    4.00    5.00    5.00    5.00    4.00    4.00    4.00    4.00    4.88    4.44    4.50    4.20    4.54
    1.00    2.00    3.00    3.00    1.00    1.00    1.00    1.00    1.00    1.00    1.00    1.00    1.00    1.00    1.00    1.00    1.00    1.00    1.00    1.00    1.00    1.00    1.00    1.00    1.00    1.00    1.00    1.00    1.00    1.00    1.00    1.00    1.00    1.00    1.00    1.00    1.00
    1.00    1.00    3.00     .00    5.00    5.00    5.00    4.00    4.00    5.00    4.00    4.00    5.00    5.00    5.00    5.00    5.00    5.00    5.00    4.00    5.00    5.00    5.00    5.00    5.00    5.00    5.00    4.00    5.00    5.00    5.00    4.00    4.50    4.89    5.00    4.60    4.75
    1.00    2.00    1.00    3.00    4.00    4.00    4.00    4.00    4.00    4.00    4.00    4.00    4.00    4.00    4.00    4.00    4.00    4.00    4.00    4.00    4.00    4.00    4.00    4.00    4.00    4.00    4.00    4.00    4.00    4.00    4.00    4.00    4.00    4.00    4.00    4.00    4.00
    1.00    2.00    3.00    3.00    3.00    3.00    4.00    4.00    4.00    4.00    4.00    4.00    3.00    3.00    3.00    4.00    5.00    5.00    5.00    5.00    5.00    5.00    4.00    5.00    3.00    3.00    4.00    4.00    5.00    5.00    5.00    5.00    3.75    4.22    4.00    4.80    4.14
    1.00    1.00    3.00    3.00    5.00    5.00    5.00    5.00    5.00    3.00    2.00    5.00    2.00    3.00    2.00    4.00    1.00    1.00    1.00    4.00    3.00    1.00    2.00    3.00    5.00    5.00    5.00    5.00    1.00    1.00    1.00    4.00    4.38    2.33    3.50    2.40    3.18
    1.00    1.00    3.00    3.00    4.00    4.00    3.00    3.00    3.00    3.00    2.00    3.00    2.00    2.00    3.00    3.00    3.00    3.00    3.00    3.00    3.00    3.00    3.00    3.00    4.00    4.00    3.00    3.00    3.00    3.00    3.00    3.00    3.13    2.78    3.33    3.00    3.04
    1.00    2.00    3.00     .00    4.00    4.00    4.00    4.00    3.00    3.00    3.00    4.00    4.00    4.00    4.00    5.00    5.00    4.00    4.00    3.00    4.00    4.00    5.00    3.00    4.00    4.00    4.00    4.00    5.00    4.00    4.00    3.00    3.63    4.11    4.00    4.00    3.93
    1.00    2.00    2.00    3.00    5.00    5.00    5.00    4.00    5.00    3.00    2.00    5.00    1.00    1.00    4.00    5.00    5.00    2.00    2.00    5.00    2.00    2.00    5.00    2.00    5.00    5.00    5.00    4.00    5.00    2.00    2.00    5.00    4.25    3.00    4.00    3.60    3.68
    1.00    2.00    2.00    3.00    4.00    5.00    4.00    4.00    4.00    4.00    4.00    4.00    2.00    4.00    1.00    3.00    1.00    2.00    2.00    2.00    2.00    2.00    4.00    4.00    4.00    5.00    4.00    4.00    1.00    2.00    2.00    2.00    4.13    2.11    3.83    2.20    3.07
    1.00    2.00    3.00    3.00    5.00    3.00    4.00    4.00    4.00    4.00    5.00    5.00    4.00    5.00    5.00    5.00    5.00    5.00    5.00    4.00    5.00    5.00    4.00    4.00    5.00    3.00    4.00    4.00    5.00    5.00    5.00    4.00    4.25    4.78    4.17    4.60    4.46
    2.00    2.00    3.00     .00    3.00    4.00    5.00    4.00    5.00    3.00    4.00    5.00    2.00    5.00    3.00    4.00    2.00    2.00    3.00    3.00    3.00    3.00    4.00    3.00    3.00    4.00    5.00    4.00    2.00    2.00    3.00    3.00    4.13    3.00    3.67    2.80    3.43
    1.00    1.00    2.00    3.00    5.00    3.00    5.00    5.00    5.00    1.00    1.00    3.00    1.00    5.00    3.00    5.00    3.00    1.00    1.00    5.00    5.00    1.00    1.00    5.00    5.00    3.00    5.00    5.00    3.00    1.00    1.00    5.00    3.50    3.22    3.33    3.00    3.29
    1.00    2.00    2.00    3.00    4.00    5.00    5.00    5.00    5.00    5.00    2.00    5.00    2.00    4.00    5.00    5.00    5.00    5.00    5.00    5.00    5.00    5.00    5.00    5.00    4.00    5.00    5.00    5.00    5.00    5.00    5.00    5.00    4.50    4.56    4.83    5.00    4.68
    1.00    1.00    3.00    3.00    5.00    5.00    5.00    5.00    5.00    5.00    5.00    4.00    3.00    5.00    4.00    4.00    3.00    5.00    4.00    3.00    4.00    5.00    4.00    4.00    5.00    5.00    5.00    5.00    3.00    5.00    4.00    3.00    4.88    3.89    4.67    4.00    4.36
    1.00    1.00    3.00    3.00    5.00    5.00    4.00    5.00    5.00    5.00    3.00    4.00    4.00    5.00    5.00    5.00    5.00    5.00    5.00    5.00    5.00    5.00    5.00    5.00    5.00    5.00    4.00    5.00    5.00    5.00    5.00    5.00    4.50    4.89    4.83    5.00    4.79
    2.00    2.00    3.00     .00    5.00    5.00    5.00    4.00    4.00    1.00    1.00    5.00    1.00    5.00    2.00    5.00    5.00    3.00    4.00    5.00    5.00    5.00    3.00    5.00    5.00    5.00    5.00    4.00    5.00    3.00    4.00    5.00    3.75    3.89    4.67    4.20    4.07
    1.00    1.00    3.00    3.00    5.00    5.00    5.00    4.00    5.00    5.00    5.00    5.00    5.00    5.00    5.00    5.00    5.00    5.00    5.00    5.00    5.00    5.00    5.00    5.00    5.00    5.00    5.00    4.00    5.00    5.00    5.00    5.00    4.88    5.00    5.00    4.80    4.93
    1.00    2.00    3.00    3.00    3.00    4.00    2.00    5.00    4.00    2.00    4.00    4.00    4.00    4.00    2.00    3.00    2.00    2.00    2.00    4.00    2.00    2.00    5.00    3.00    3.00    4.00    2.00    5.00    2.00    2.00    2.00    4.00    3.50    2.78    3.17    3.00    3.11
    1.00    2.00    3.00    3.00    5.00    1.00    1.00    2.00    3.00    4.00    1.00    1.00    1.00    1.00    1.00    4.00    3.00    1.00    1.00    1.00    2.00    1.00    4.00    4.00    5.00    1.00    1.00    2.00    3.00    1.00    1.00    1.00    2.25    1.67    2.67    1.60    2.04
    1.00    2.00    3.00     .00    3.00    4.00    5.00    4.00    4.00    3.00    2.00    4.00    2.00    3.00    3.00    4.00    4.00    3.00    3.00    3.00    3.00    4.00    4.00    3.00    3.00    4.00    5.00    4.00    4.00    3.00    3.00    3.00    3.63    3.11    3.83    3.40    3.46
    1.00    2.00    3.00    3.00    5.00    1.00    1.00    1.00    1.00    1.00    1.00    1.00    1.00    1.00    1.00    1.00    1.00    1.00    1.00    1.00    1.00    1.00    1.00    1.00    5.00    1.00    1.00    1.00    1.00    1.00    1.00    1.00    1.50    1.00    1.67    1.00    1.29
    1.00    2.00    2.00    3.00    5.00    1.00    5.00    5.00    4.00    2.00    3.00    5.00    3.00    1.00    2.00    4.00    4.00    5.00    5.00    5.00    5.00    5.00    3.00    4.00    5.00    1.00    5.00    5.00    4.00    5.00    5.00    5.00    3.75    3.78    3.83    4.80    3.96
    1.00    2.00    1.00    3.00    3.00    5.00    5.00    4.00    4.00    1.00    1.00    5.00    1.00    3.00    3.00    5.00    2.00    1.00    1.00    5.00    1.00    3.00    5.00    5.00    3.00    5.00    5.00    4.00    2.00    1.00    1.00    5.00    3.50    2.44    4.33    2.60    3.18
    1.00    2.00    3.00     .00    4.00    5.00    5.00    4.00    3.00    5.00    1.00    5.00    1.00    3.00    1.00    1.00    5.00    4.00    5.00    5.00    4.00    2.00    5.00    3.00    4.00    5.00    5.00    4.00    5.00    4.00    5.00    5.00    4.00    3.22    4.00    4.60    3.86
    1.00    1.00    3.00    2.00    4.00    5.00    5.00    4.00    4.00    3.00    1.00    4.00    1.00    3.00    2.00    4.00    4.00    4.00    4.00    4.00    4.00    5.00    2.00    5.00    4.00    5.00    5.00    4.00    4.00    4.00    4.00    4.00    3.75    3.33    4.33    4.00    3.79
    1.00    1.00    3.00     .00    5.00    5.00    5.00    5.00    5.00    5.00    5.00    5.00    5.00    5.00    5.00    5.00    5.00    5.00    5.00    5.00    5.00    5.00    5.00    5.00    5.00    5.00    5.00    5.00    5.00    5.00    5.00    5.00    5.00    5.00    5.00    5.00    5.00
    2.00    2.00    2.00    3.00    5.00    3.00    3.00    1.00    4.00    1.00    5.00    5.00    5.00    5.00    5.00    5.00    5.00    3.00    5.00    5.00    1.00    5.00    5.00    5.00    5.00    3.00    3.00    1.00    5.00    3.00    5.00    5.00    3.38    4.33    4.33    3.80    3.96
    1.00    2.00    2.00    2.00    2.00    4.00    5.00    4.00    5.00    5.00    5.00    5.00    5.00    5.00    5.00    5.00    5.00    5.00    5.00    5.00    5.00    5.00    5.00    5.00    2.00    4.00    5.00    4.00    5.00    5.00    5.00    5.00    4.38    5.00    4.33    4.80    4.64
    1.00    2.00    3.00    3.00    3.00    3.00    4.00    5.00    5.00    3.00    1.00    5.00    5.00    5.00    4.00    4.00    4.00    4.00    4.00    4.00    4.00    4.00    4.00    4.00    3.00    3.00    4.00    5.00    4.00    4.00    4.00    4.00    3.63    4.22    3.67    4.20    3.93
    2.00    1.00    3.00    3.00    5.00    1.00    5.00    5.00    5.00    3.00    1.00    5.00    1.00    5.00    5.00    5.00    4.00    1.00    4.00    5.00    5.00    4.00    3.00    5.00    5.00    1.00    5.00    5.00    4.00    1.00    4.00    5.00    3.75    3.89    3.83    3.80    3.82
    1.00    2.00    2.00    3.00    5.00    5.00    5.00    5.00    4.00    4.00    4.00    5.00    4.00    4.00    4.00    5.00    3.00    4.00    4.00    3.00    3.00    5.00    4.00    4.00    5.00    5.00    5.00    5.00    3.00    4.00    4.00    3.00    4.63    3.78    4.67    3.80    4.21
    1.00    2.00    2.00    3.00    4.00    4.00    5.00    5.00    5.00    4.00    5.00    5.00    5.00    5.00    4.00    5.00    5.00    5.00    5.00    5.00    5.00    5.00    4.00    5.00    4.00    4.00    5.00    5.00    5.00    5.00    5.00    5.00    4.63    4.89    4.50    5.00    4.75
    1.00    2.00    3.00    3.00    4.00    5.00    5.00    5.00    4.00    4.00    5.00    5.00    5.00    5.00    3.00    5.00    5.00    5.00    5.00    5.00    5.00    5.00    3.00    4.00    4.00    5.00    5.00    5.00    5.00    5.00    5.00    5.00    4.63    4.78    4.33    5.00    4.68
    1.00    2.00    3.00    3.00    4.00    4.00    4.00    4.00    5.00    4.00    2.00    4.00    2.00    4.00    4.00    4.00    2.00    2.00    2.00    4.00    3.00    2.00    2.00    2.00    4.00    4.00    4.00    4.00    2.00    2.00    2.00    4.00    3.88    3.00    3.00    2.80    3.21
    1.00    2.00    2.00    3.00    4.00    5.00    5.00    5.00    5.00    2.00    1.00    5.00    1.00    5.00    3.00    5.00    5.00    1.00    5.00    5.00    5.00    2.00    1.00    5.00    4.00    5.00    5.00    5.00    5.00    1.00    5.00    5.00    4.00    3.89    3.67    4.20    3.93
    1.00    2.00    3.00    3.00    5.00    4.00    5.00    4.00    3.00    4.00    2.00    4.00    2.00    4.00    4.00    5.00    3.00    4.00    5.00    5.00    5.00    5.00    4.00    4.00    5.00    4.00    5.00    4.00    3.00    4.00    5.00    5.00    3.88    4.11    4.50    4.20    4.14
    2.00    1.00    3.00    3.00    5.00    5.00    5.00    5.00    5.00    5.00    4.00    5.00    3.00    4.00    5.00    5.00    1.00    1.00    5.00    5.00    5.00    1.00    5.00    5.00    5.00    5.00    5.00    5.00    1.00    1.00    5.00    5.00    4.88    3.78    4.33    3.40    4.14
    1.00    1.00    3.00     .00    4.00    5.00    5.00    4.00    4.00    4.00    4.00    5.00    4.00    4.00    5.00    5.00    5.00    5.00    5.00    5.00    3.00    4.00    4.00    4.00    4.00    5.00    5.00    4.00    5.00    5.00    5.00    5.00    4.38    4.56    4.33    4.80    4.50
    1.00    2.00    3.00     .00    4.00    5.00    5.00    4.00    4.00    5.00    3.00    5.00    3.00    4.00    4.00    4.00    4.00    3.00    5.00    4.00    4.00    5.00    4.00    3.00    4.00    5.00    5.00    4.00    4.00    3.00    5.00    4.00    4.38    3.89    4.33    4.00    4.14
    1.00    1.00    3.00     .00    5.00    5.00    4.00    4.00    4.00    3.00    4.00    4.00    3.00    4.00    1.00    4.00    4.00    4.00    4.00    5.00    5.00    5.00    2.00    4.00    5.00    5.00    4.00    4.00    4.00    4.00    4.00    5.00    4.13    3.78    4.17    4.20    4.04
    1.00    1.00    3.00     .00    5.00    5.00    5.00    4.00    4.00    4.00    4.00    5.00    5.00    4.00    4.00    5.00    5.00    4.00    5.00    5.00    4.00    4.00    5.00    5.00    5.00    5.00    5.00    4.00    5.00    4.00    5.00    5.00    4.50    4.56    4.83    4.60    4.61
    1.00    2.00    2.00    3.00    5.00    5.00    4.00    4.00    3.00    4.00    5.00    5.00    3.00    5.00    5.00    1.00    1.00    2.00    5.00    5.00    5.00    2.00    3.00    5.00    5.00    5.00    4.00    4.00    1.00    2.00    5.00    5.00    4.38    3.56    4.00    3.40    3.86
    1.00    2.00    1.00    3.00    4.00    5.00    5.00    5.00    5.00    5.00    5.00    5.00    5.00    5.00    5.00    5.00    4.00    4.00    4.00    4.00    4.00    4.00    4.00    5.00    4.00    5.00    5.00    5.00    4.00    4.00    4.00    4.00    4.88    4.44    4.50    4.20    4.54
    1.00    2.00    3.00     .00    5.00    5.00    5.00    4.00    4.00    4.00    4.00    5.00    3.00    4.00    5.00    5.00    4.00    4.00    5.00    5.00    5.00    5.00    4.00    4.00    5.00    5.00    5.00    4.00    4.00    4.00    5.00    5.00    4.50    4.44    4.67    4.40    4.50
    1.00    2.00    3.00    3.00    4.00    5.00    5.00    5.00    4.00    4.00    4.00    5.00    4.00    4.00    4.00    5.00    4.00    4.00    4.00    5.00    5.00    5.00    4.00    4.00    4.00    5.00    5.00    5.00    4.00    4.00    4.00    5.00    4.50    4.33    4.50    4.40    4.43
    1.00    2.00    2.00    3.00    5.00    3.00    5.00    5.00    4.00    3.00    5.00    5.00    5.00    4.00    5.00    4.00    5.00    4.00    5.00    5.00    5.00    5.00    3.00    1.00    5.00    3.00    5.00    5.00    5.00    4.00    5.00    5.00    4.38    4.67    3.67    4.80    4.39
    1.00    2.00    3.00     .00    4.00    4.00    4.00    4.00    4.00    3.00    3.00    5.00    5.00    2.00    1.00    3.00    2.00    3.00    5.00    4.00    4.00    2.00    2.00    4.00    4.00    4.00    4.00    4.00    2.00    3.00    5.00    4.00    3.88    3.22    3.33    3.60    3.50
    1.00    2.00    3.00    3.00    5.00    5.00    5.00    5.00    4.00    4.00    1.00    4.00    2.00    3.00    2.00    4.00    4.00    2.00    4.00    4.00    4.00    3.00    3.00    4.00    5.00    5.00    5.00    5.00    4.00    2.00    4.00    4.00    4.13    3.22    4.17    3.80    3.79
